# Supplementary material for: Long Non-Coding RNAs Associated with Ribosomes in Human Adipose-Derived Stem Cells: From RNAs to Microproteins
Source: MDPI journal article supplement (doi:10.3390/biom11111673), 2021-11-11
Supplement: s1 [file s1]

# 1. SUPPLEMENTARY FIGURES

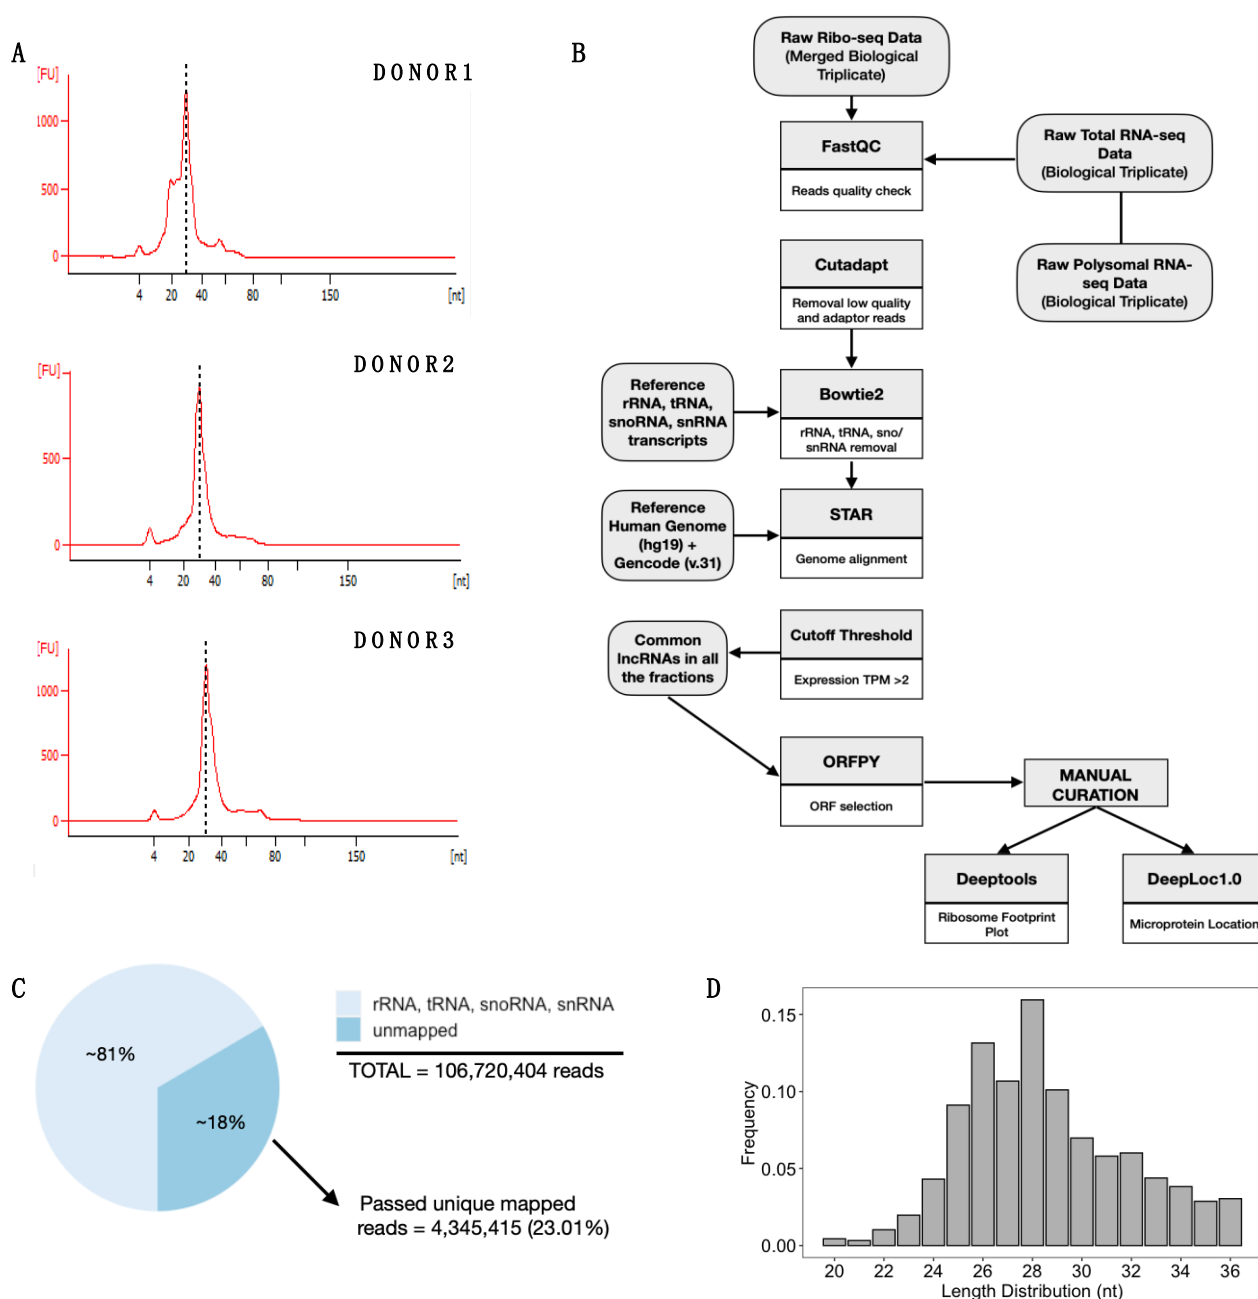

**Figure S1. Ribosome profiling characterization.** (A) Bioanalyzer analysis showed 30 nucleotides ribosome-protected RNA fragments in hASC replicates (samples from DONOR1, DONOR2 and DONOR3, respectively). Dashed lines represents 30 nucleotides fragment size. (B) Bioinformatics workflow to identify smORFs within lncRNAs. (C) Overview of Ribo-seq reads and passed unique reads using in the analysis. (D) Alignment reads distribution of Ribo-seq in hASC.

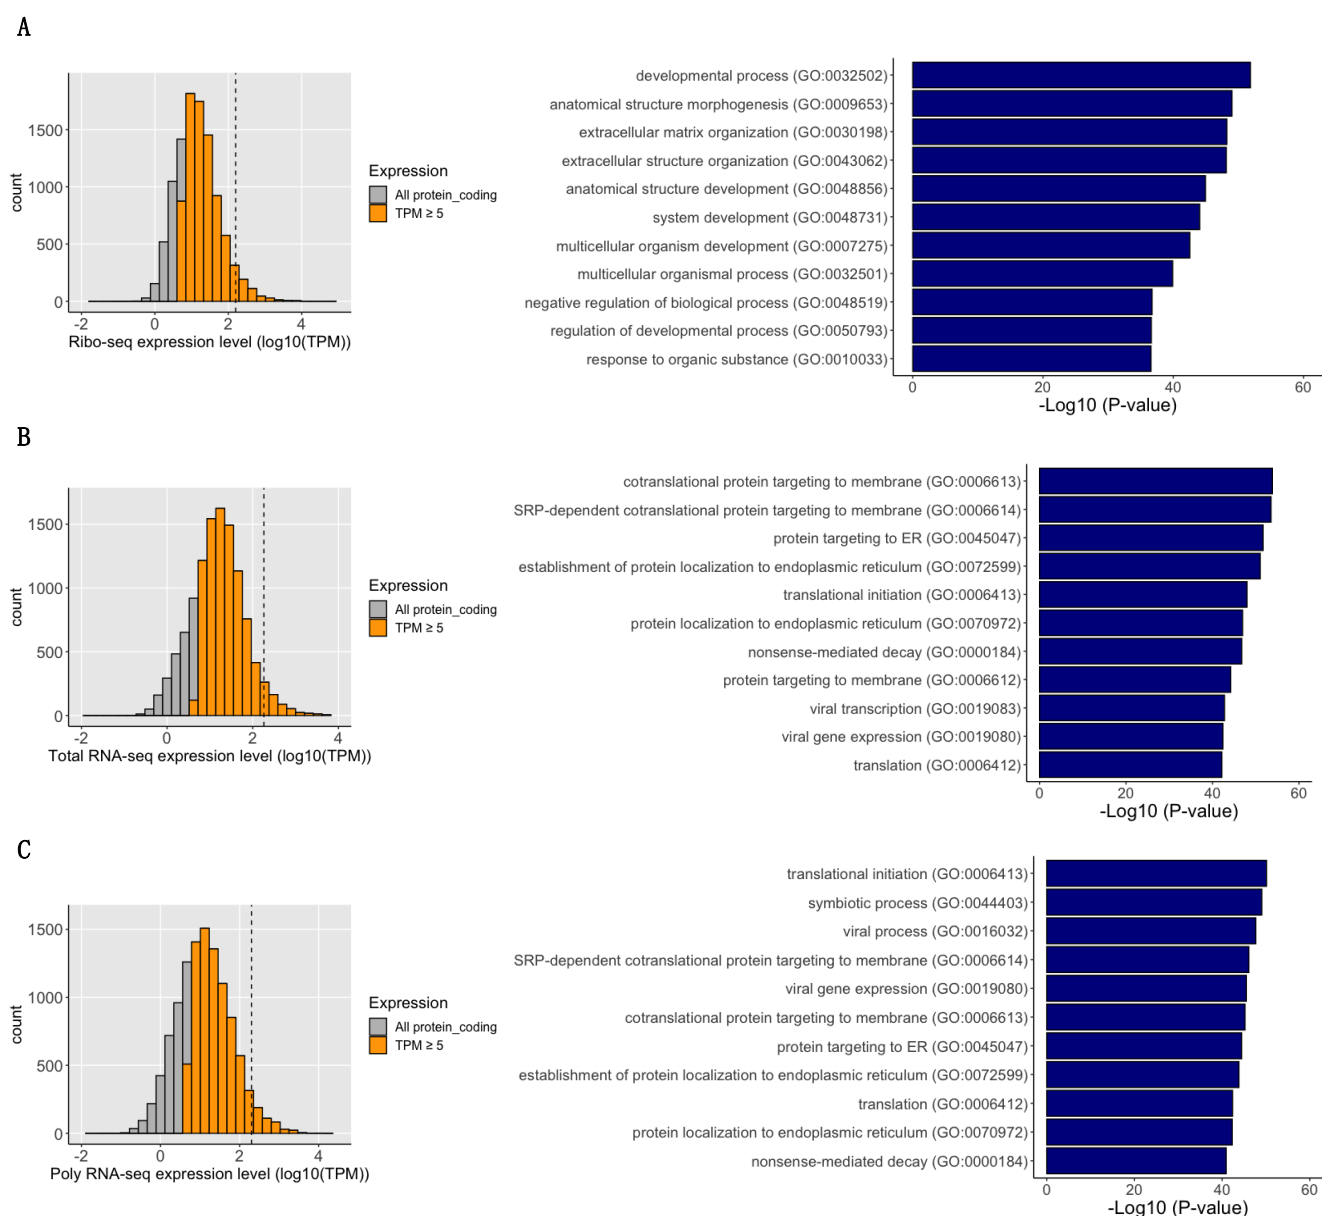

**Figure S2. Expression profile of protein-coding genes in sequenced hASC.** (A) Expression levels of Ribo-seq protein-coding genes and, the Gene Ontology analysis of the highest expressed genes. (B) Expression levels of Total RNA-seq protein-coding genes and, Gene Ontology of the highest expressed genes. (C) Expression levels of Poly RNA-seq protein-coding genes and, Gene Ontology of the highest expressed genes. On the right of vertical dashed line are represented the five hundred high-expressed genes.

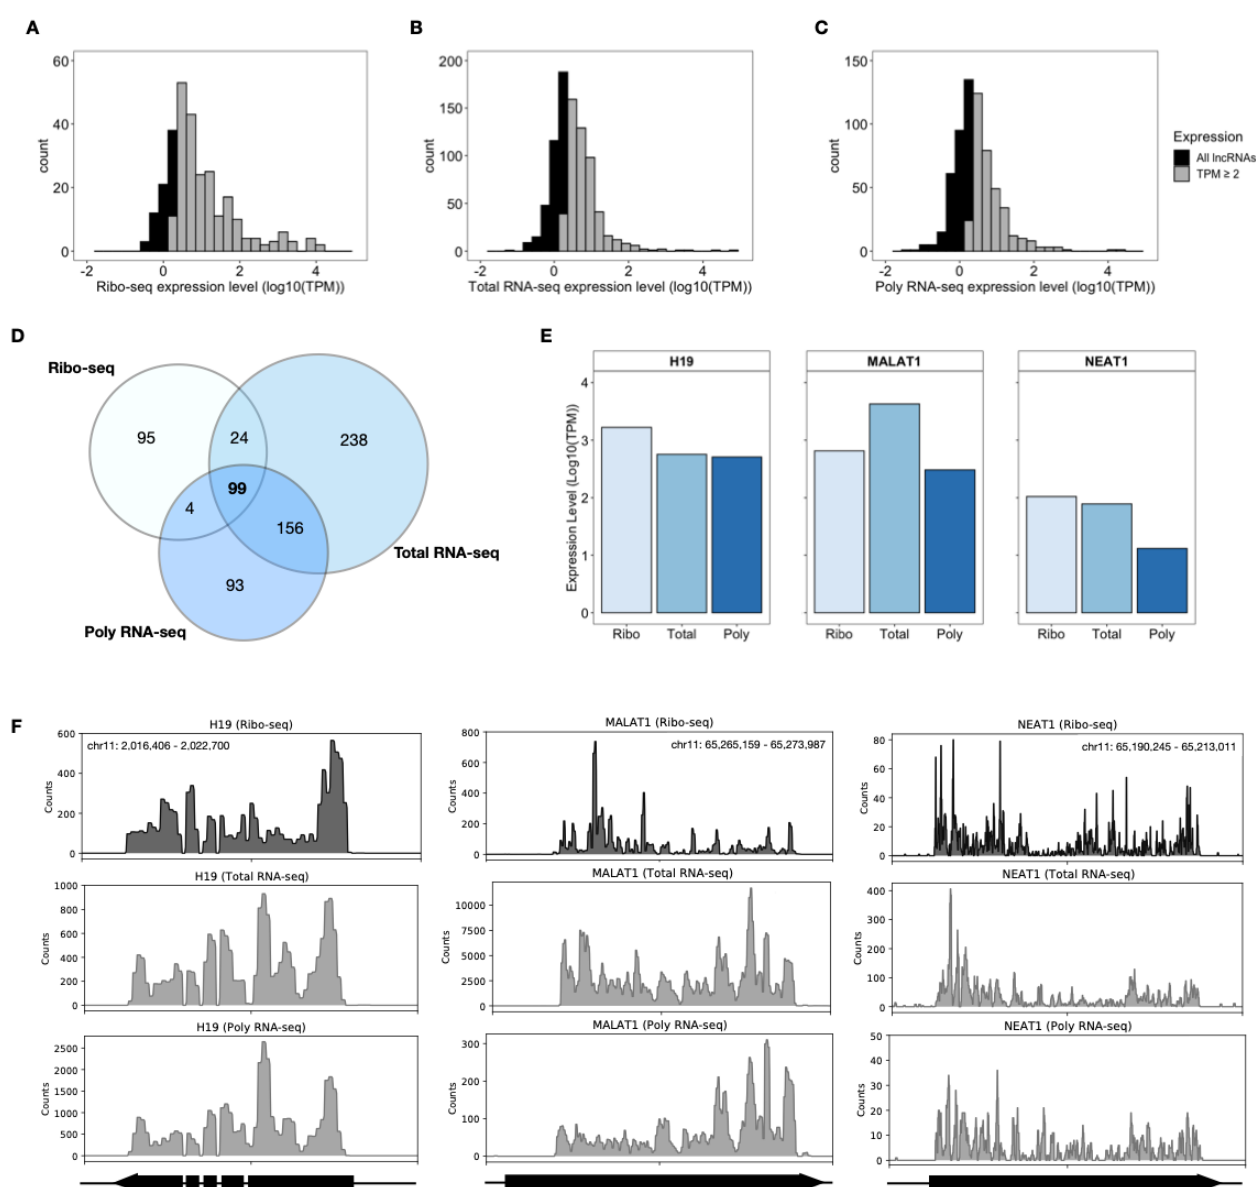

**Figure S3. Expression profile of lncRNAs in transcriptome, translome and ribosome-protected fragments.** (A–C) Histograms showing the expression level profile of lncRNAs in the Ribo-seq, Total RNA-seq and Poly RNA-seq, respectively. (D) Venn diagram showing the comparison of differential lncRNAs in the Ribo-seq, Total RNA-seq and Poly RNA-seq. (E) Expression levels of lncRNAs H19 (left panel), MALAT1 (middle panel) and NEAT1 (right panel). (F) Cover plots representing mapped profile of the H19, MALAT1 and NEAT1 lncRNAs, respectively. Upper panel represents Ribo-seq data, middle panel represents Total RNA-seq data and, lower panel represents Poly RNA-seq data. Y-axis represents raw reads count.

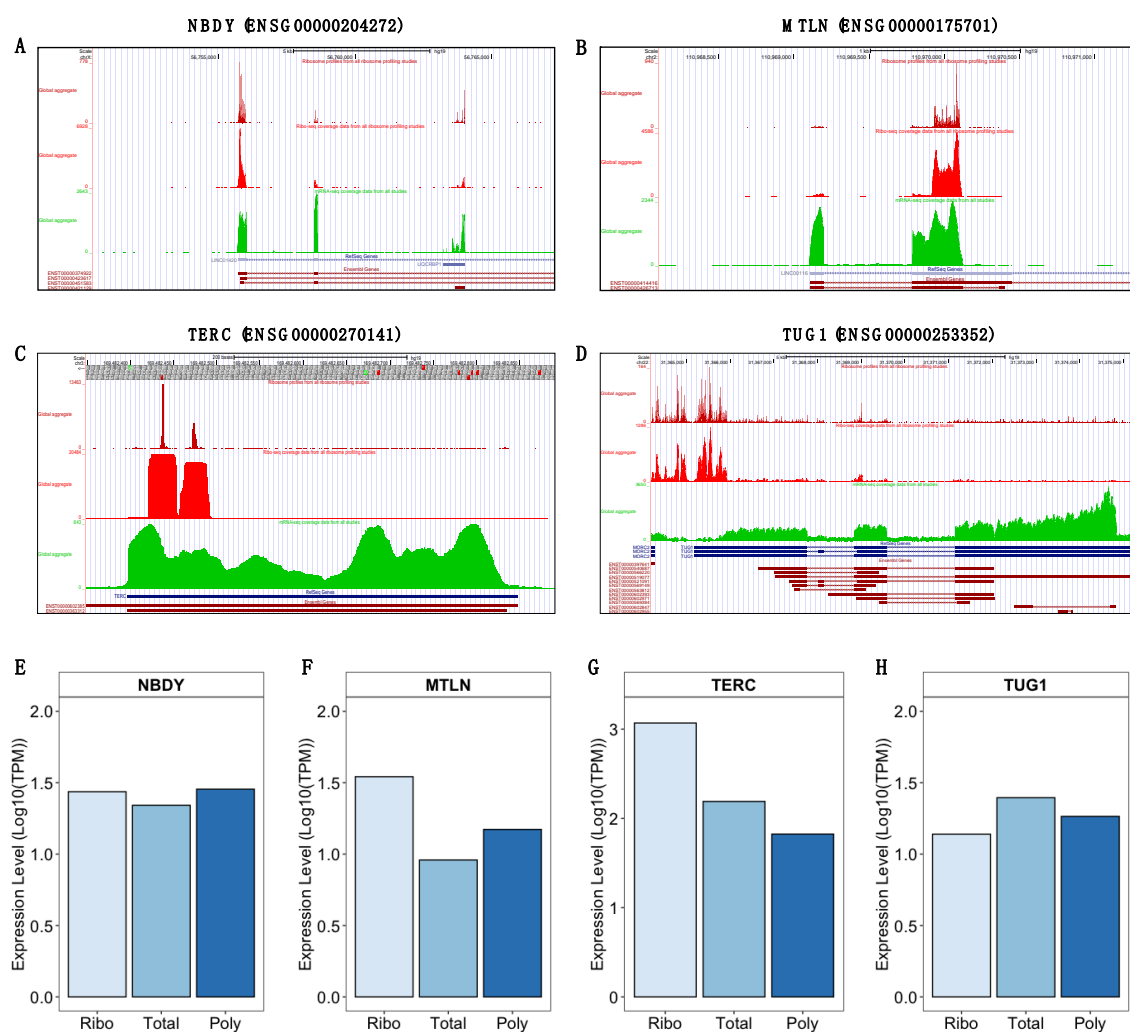

**Figure S4. smORF-derived microproteins.** GWIPS-viz expression profiles of Ribo-seq (A-site)\* coverage (Upper panel), Ribo-seq coverage (Middle panel) and RNA-seq coverage (Lower panel). Plots represent global aggregate from all samples of (A) NBDY, (B) MTLN, (C) TERC and (D) TUG1. Expression levels in different sequenced cell fractions of (E) NBDY, (F) MTLN, (G) TERC and (H) TUG1, respectively. \*Footprint reads align only to the A-site position (elongating ribosomes).

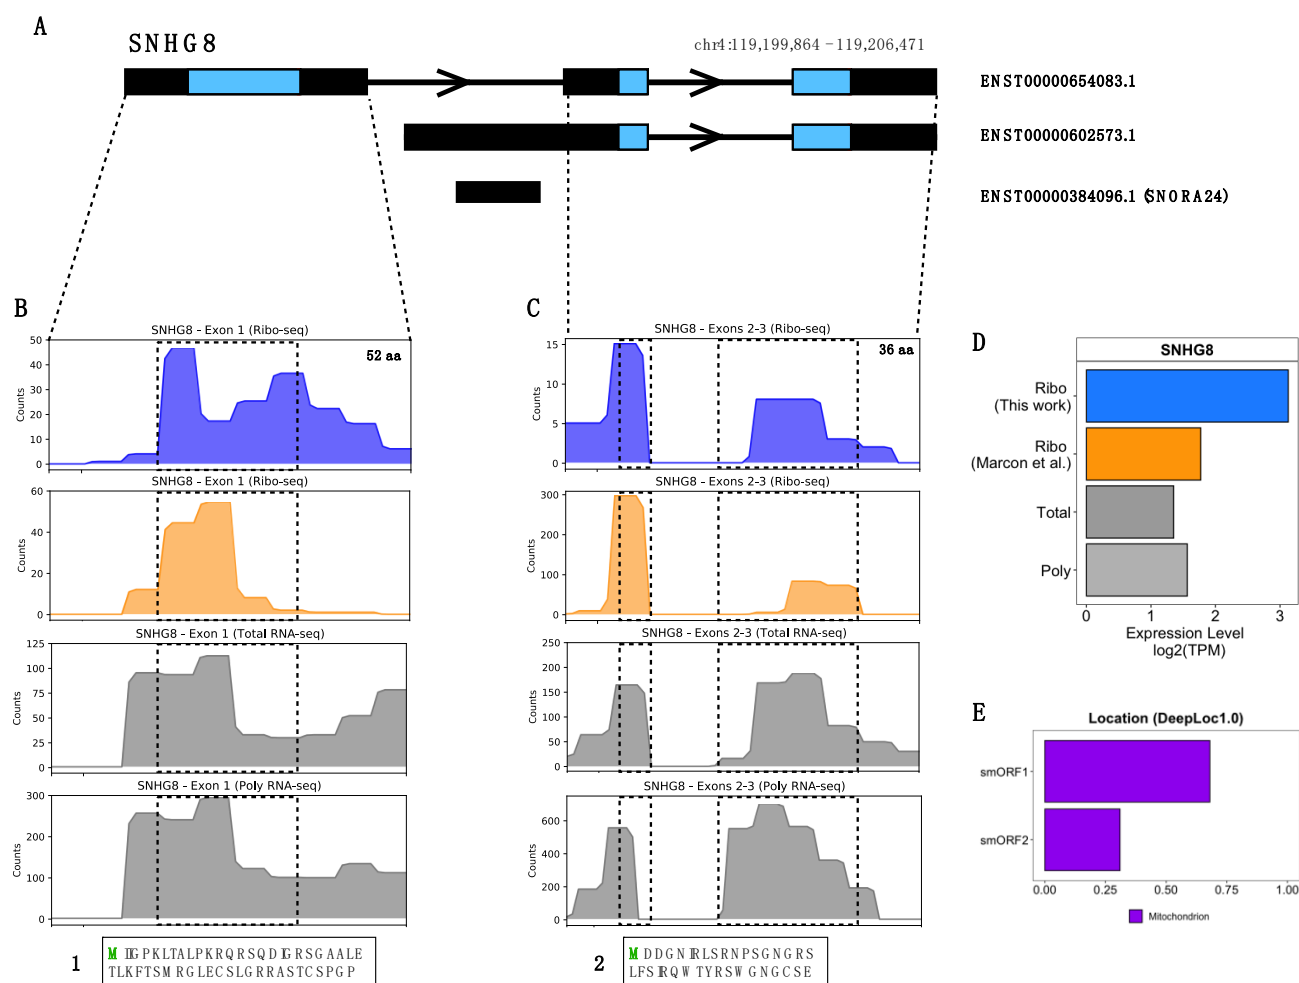

**Figure S5. Ribosome occupancy of lncRNA SNHG8.** (A) Examples of transcripts isoforms of SNHG8 and SNORA24. (B) Ribosome footprint of smORF in exon 1 of SNHG8. (C) Ribosome footprint of smORF in exon 2 of SNHG8. (D) Normalized expression levels (TPM) of SNHG8 in different Ribo-seq datasets and in Total and Polysomal RNA-seq. (E) Localization prediction of two microproteins showed. Light blue boxes indicate the smORF location in transcripts, and the dashed boxes represent the smORF location in the read coverage plot.

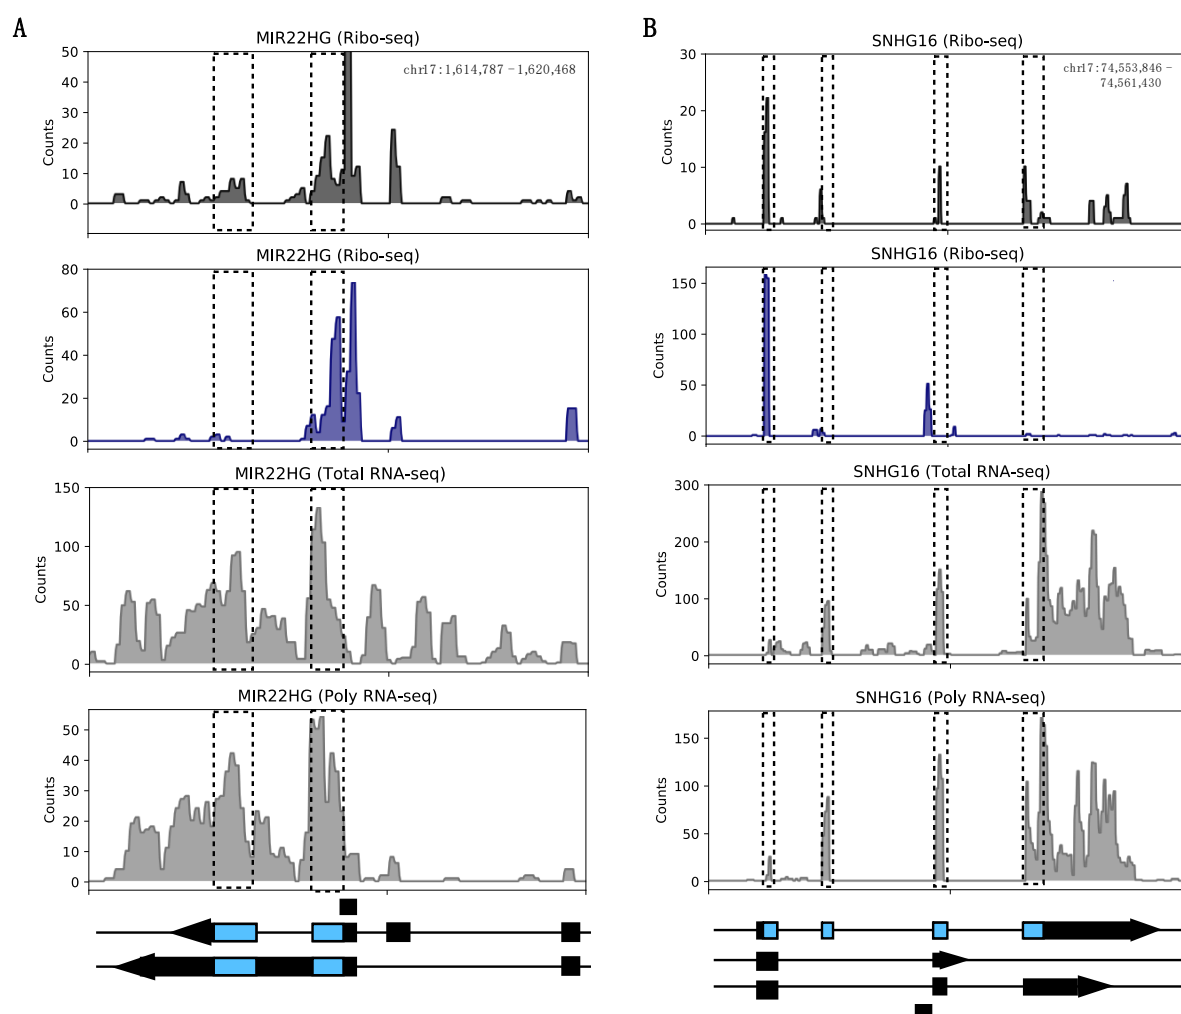

**Figure S6. Ribosome occupancy of lncRNAs MIR22HG and SNHG16.** First and second panel shows Ribosome occupancy (Ribo-seq from this study and from Marcon et al., respectively), third and last panel shows Total and Polysomal RNA-seq coverage in lncRNA (A) MIR22HG and (B) SNHG16. Light blue boxes indicate the smORF location in transcripts, and the dashed boxes represent the smORF location in the read coverage plot.

## 2. Supplementary Tables

**Table S1.** Ribo-seq identified 222 lncRNAs associated with ribosomes in human adipose-derived stem cells (hASC).

| GeneID             | Chr   | Gene_Name  | Log <sub>10</sub> (TPM) |
|--------------------|-------|------------|-------------------------|
| ENSG00000197989.14 | chr1  | SNHG12     | 4,197418754             |
| ENSG00000270103.3  | chr1  | AL360012.1 | 4,164638916             |
| ENSG00000270066.3  | chr1  | AL356488.2 | 3,96874259              |
| ENSG00000269900.3  | chr9  | RMRP       | 3,872393912             |
| ENSG00000259001.3  | chr14 | AL355075.4 | 3,868363709             |
| ENSG00000266402.3  | chr17 | SNHG25     | 3,78236774              |
| ENSG00000261441.1  | chr15 | AC124068.2 | 3,467770788             |
| ENSG00000234741.8  | chr1  | GAS5       | 3,387257122             |
| ENSG00000248473.2  | chr5  | LINC01962  | 3,282235737             |
| ENSG00000130600.19 | chr11 | H19        | 3,220617018             |
| ENSG00000269893.8  | chr4  | SNHG8      | 3,127156356             |
| ENSG00000232956.9  | chr7  | SNHG15     | 3,108720596             |
| ENSG00000255717.7  | chr11 | SNHG1      | 3,094972281             |

|                    |       |            |             |
|--------------------|-------|------------|-------------|
| ENSG00000270141.3  | chr3  | TERC       | 3,068554656 |
| ENSG00000276232.1  | chr12 | AC006064.5 | 3,064485538 |
| ENSG00000270022.3  | chr22 | Z93241.1   | 2,944930567 |
| ENSG00000251562.8  | chr11 | MALAT1     | 2,813552084 |
| ENSG00000238265.1  | chr21 | LINC00317  | 2,789874039 |
| ENSG00000175061.18 | chr17 | SNHG29     | 2,774810293 |
| ENSG00000260464.1  | chr1  | AL049796.1 | 2,535396692 |
| ENSG00000233016.7  | chr9  | SNHG7      | 2,529082333 |
| ENSG00000242125.3  | chr1  | SNHG3      | 2,465716925 |
| ENSG00000234912.12 | chr17 | SNHG20     | 2,423696676 |
| ENSG00000254911.3  | chr11 | SCARNA9    | 2,350233662 |
| ENSG00000287173.1  | chr10 | AL356157.3 | 2,267501778 |
| ENSG00000203875.12 | chr6  | SNHG5      | 2,253682945 |
| ENSG00000163597.15 | chr17 | SNHG16     | 2,158462361 |
| ENSG00000245910.8  | chr8  | SNHG6      | 2,15023555  |
| ENSG00000235586.1  | chr2  | AC011247.1 | 2,026547702 |
| ENSG00000245532.9  | chr11 | NEAT1      | 2,019564477 |
| ENSG00000186594.14 | chr17 | MIR22HG    | 2,00077012  |
| ENSG00000274370.1  | chr17 | AC130371.2 | 1,941077092 |
| ENSG00000259932.1  | chr15 | AC051619.7 | 1,932630256 |
| ENSG00000276668.1  | chr11 | AC104237.3 | 1,916704124 |
| ENSG00000174365.20 | chr20 | SNHG11     | 1,861130787 |
| ENSG00000227512.1  | chr9  | AL592301.1 | 1,85532989  |
| ENSG00000232598.2  | chr6  | AL122034.1 | 1,814052804 |
| ENSG00000260035.1  | chr15 | AC051619.8 | 1,812598854 |
| ENSG00000279063.1  | chr19 | AC008735.5 | 1,787723865 |
| ENSG00000244586.1  | chr3  | WNT5A-AS1  | 1,771321965 |
| ENSG00000272482.1  | chr1  | AC254633.1 | 1,719864781 |
| ENSG00000177410.13 | chr20 | ZFAS1      | 1,697557279 |
| ENSG00000262031.1  | chr17 | LINC01974  | 1,683143335 |
| ENSG00000234264.1  | chr1  | DEPDC1-AS1 | 1,675455511 |
| ENSG00000226310.1  | chrX  | AL022157.1 | 1,67462257  |
| ENSG00000261888.1  | chr17 | AC144831.1 | 1,641062035 |
| ENSG00000257178.5  | chr17 | AC103702.1 | 1,638155773 |
| ENSG00000281189.1  | chr7  | GHET1      | 1,63330583  |
| ENSG00000276116.2  | chr14 | FUT8-AS1   | 1,622875864 |
| ENSG00000269806.1  | chr19 | BICRA-AS1  | 1,621154191 |
| ENSG00000283907.1  | chr19 | AD000090.1 | 1,607422621 |
| ENSG00000283696.1  | chr1  | AL592295.4 | 1,603484407 |
| ENSG00000278996.1  | chr21 | FP671120.2 | 1,587401273 |
| ENSG00000249456.1  | chr10 | AL731577.2 | 1,577059973 |
| ENSG00000247516.8  | chr5  | MIR4458HG  | 1,575478611 |
| ENSG00000280800.1  | chr21 | FP671120.4 | 1,545207491 |
| ENSG00000276107.1  | chr15 | AC037198.1 | 1,436045596 |
| ENSG00000232821.1  | chr7  | AC003986.2 | 1,426921503 |
| ENSG00000228487.2  | chr9  | AL450263.1 | 1,421958084 |
| ENSG00000248187.1  | chr4  | AC078850.1 | 1,412064432 |
| ENSG00000224046.2  | chr7  | AC005076.1 | 1,382572263 |
| ENSG00000234362.6  | chr2  | LINC01914  | 1,375264757 |

|                    |       |              |             |
|--------------------|-------|--------------|-------------|
| ENSG00000225746.12 | chr14 | MEG8         | 1,371372611 |
| ENSG00000287368.1  | chr9  | AL589645.1   | 1,370404242 |
| ENSG00000266978.1  | chr19 | AC011511.2   | 1,358510275 |
| ENSG00000270504.1  | chr6  | AL391422.4   | 1,357407804 |
| ENSG00000277459.1  | chr11 | AP001527.2   | 1,325028952 |
| ENSG00000224032.7  | chr5  | EPB41L4A-AS1 | 1,31695065  |
| ENSG00000260032.2  | chr20 | NORAD        | 1,299534542 |
| ENSG00000256073.3  | chr21 | URB1-AS1     | 1,289778173 |
| ENSG00000236901.6  | chr9  | MIR600HG     | 1,277485652 |
| ENSG00000224049.1  | chr3  | AC108681.1   | 1,264041938 |
| ENSG00000223764.2  | chr1  | LINC02593    | 1,263762918 |
| ENSG00000234696.1  | chrX  | GPR50-AS1    | 1,246536516 |
| ENSG00000272841.1  | chr6  | AL139393.3   | 1,240706972 |
| ENSG00000285915.1  | chr18 | AC015819.4   | 1,233520854 |
| ENSG00000163364.10 | chr2  | LINC01116    | 1,19543506  |
| ENSG00000254531.1  | chr4  | AP001816.1   | 1,195246536 |
| ENSG00000259649.4  | chr15 | AC027808.2   | 1,186538586 |
| ENSG00000228549.4  | chr1  | BX284668.2   | 1,177341888 |
| ENSG00000232533.1  | chr7  | AC093673.1   | 1,167355269 |
| ENSG00000272086.1  | chr5  | AC025181.2   | 1,153937153 |
| ENSG00000278954.1  | chr17 | AC130686.1   | 1,143239704 |
| ENSG00000253352.9  | chr22 | TUG1         | 1,139738783 |
| ENSG00000259721.1  | chr15 | AC090877.2   | 1,119091745 |
| ENSG00000286962.1  | chr3  | AC027128.1   | 1,117310533 |
| ENSG00000279602.1  | chr17 | AC109326.1   | 1,113299963 |
| ENSG00000214548.18 | chr14 | MEG3         | 1,107147847 |
| ENSG00000228317.2  | chr9  | AL158070.1   | 1,100983324 |
| ENSG00000225733.6  | chr3  | FGD5-AS1     | 1,098621188 |
| ENSG00000267322.2  | chr18 | SNHG22       | 1,096606676 |
| ENSG00000249669.10 | chr5  | CARMN        | 1,065983952 |
| ENSG00000259863.1  | chr2  | SH3RF3-AS1   | 1,052479513 |
| ENSG00000253190.4  | chr8  | AC084082.1   | 1,047349139 |
| ENSG00000224259.7  | chr1  | LINC01133    | 0,969857273 |
| ENSG00000243479.3  | chr7  | MXN1-AS1     | 0,961479546 |
| ENSG00000229433.2  | chr3  | LINC02069    | 0,959881021 |
| ENSG00000273230.1  | chr7  | AC102953.2   | 0,945219383 |
| ENSG00000229847.9  | chr10 | EMX2OS       | 0,926289899 |
| ENSG00000204661.9  | chr5  | C5orf60      | 0,924925125 |
| ENSG00000260484.1  | chr8  | AC131902.1   | 0,920824055 |
| ENSG00000265688.2  | chr17 | MAFG-DT      | 0,905441044 |
| ENSG00000265555.1  | chr18 | LINC01903    | 0,901966365 |
| ENSG00000233901.6  | chr9  | LINC01503    | 0,901050148 |
| ENSG00000267519.6  | chr19 | AC020916.1   | 0,894957746 |
| ENSG00000281649.2  | chr9  | EBLN3P       | 0,88235128  |
| ENSG00000279176.1  | chr12 | AC079316.2   | 0,882020262 |
| ENSG00000238142.2  | chr1  | BX284668.5   | 0,880999593 |
| ENSG00000230487.8  | chr7  | PSMG3-AS1    | 0,877884416 |
| ENSG00000268205.1  | chr19 | AC005261.2   | 0,868238558 |
| ENSG00000287063.1  | chr9  | AL356489.3   | 0,858082255 |



|                    |       |              |             |
|--------------------|-------|--------------|-------------|
| ENSG00000245317.2  | chr5  | AC008393.1   | 0,857758554 |
| ENSG00000236017.8  | chrX  | ASMTL-AS1    | 0,85344901  |
| ENSG00000248222.5  | chr5  | AC011389.1   | 0,845947086 |
| ENSG00000223768.2  | chr21 | LINC00205    | 0,845220329 |
| ENSG00000233223.3  | chr17 | AC016876.1   | 0,839051189 |
| ENSG00000250786.2  | chr5  | SNHG18       | 0,834801042 |
| ENSG00000224870.7  | chr1  | MRPL20-AS1   | 0,831597539 |
| ENSG00000164385.9  | chr6  | LINC01600    | 0,828871946 |
| ENSG00000251432.7  | chr4  | LINC02615    | 0,813537549 |
| ENSG00000253982.2  | chr8  | AC100810.1   | 0,800145112 |
| ENSG00000279792.1  | chr17 | AC015909.5   | 0,799761629 |
| ENSG00000231473.3  | chr13 | RB1-DT       | 0,795186052 |
| ENSG00000260604.2  | chr6  | AL590004.3   | 0,792883406 |
| ENSG00000231187.3  | chr10 | AL356056.2   | 0,792821896 |
| ENSG00000223485.4  | chr6  | LINC01615    | 0,774229038 |
| ENSG00000239467.6  | chr2  | AC007405.3   | 0,771056644 |
| ENSG00000226137.5  | chr17 | BAIAP2-DT    | 0,762536839 |
| ENSG00000256546.2  | chr12 | AC156455.1   | 0,757634616 |
| ENSG00000267270.6  | chr18 | PARD6G-AS1   | 0,757371152 |
| ENSG00000250899.3  | chr12 | AC125807.2   | 0,755347813 |
| ENSG00000260279.4  | chr16 | AC137932.1   | 0,748017116 |
| ENSG00000215039.7  | chr12 | CD27-AS1     | 0,746315292 |
| ENSG00000250742.4  | chr12 | LINC02381    | 0,74512221  |
| ENSG00000178977.3  | chr17 | LINC00324    | 0,739630796 |
| ENSG00000273002.1  | chr1  | AL355388.2   | 0,724261376 |
| ENSG00000279198.1  | chr19 | AC008894.3   | 0,717597421 |
| ENSG00000286388.1  | chr5  | AC026748.3   | 0,715425712 |
| ENSG00000287315.1  | chr1  | AL670729.3   | 0,710136362 |
| ENSG00000177335.11 | chr8  | C8orf31      | 0,709948319 |
| ENSG00000246430.7  | chr8  | LINC00968    | 0,70670177  |
| ENSG00000197182.14 | chr22 | MIRLET7BHG   | 0,698048521 |
| ENSG00000234608.8  | chr12 | MAPKAPK5-AS1 | 0,686258942 |
| ENSG00000259426.6  | chr15 | AC027237.4   | 0,685475641 |
| ENSG00000235531.10 | chr8  | MSC-AS1      | 0,681584906 |
| ENSG00000224687.2  | chr1  | RASAL2-AS1   | 0,679668195 |
| ENSG00000229739.3  | chr1  | AL096803.2   | 0,670688582 |
| ENSG00000223749.10 | chrX  | MIR503HG     | 0,66664711  |
| ENSG00000260597.1  | chr12 | AC012531.1   | 0,664738834 |
| ENSG00000257702.3  | chr2  | LBX2-AS1     | 0,660032561 |
| ENSG00000287920.1  | chr6  | AL022098.1   | 0,652287239 |
| ENSG00000230630.5  | chr1  | DNM3OS       | 0,650550672 |
| ENSG00000215068.8  | chr5  | AC025171.2   | 0,639280118 |
| ENSG00000236819.2  | chr17 | LINC01563    | 0,624949966 |
| ENSG00000279118.1  | chr5  | AC093535.2   | 0,612320565 |
| ENSG00000203930.12 | chrX  | LINC00632    | 0,608298354 |
| ENSG00000251602.7  | chr14 | AL928654.1   | 0,60509913  |
| ENSG00000249406.3  | chr17 | AC015909.1   | 0,604681981 |
| ENSG00000232860.8  | chr1  | SMG7-AS1     | 0,595756313 |
| ENSG00000226824.7  | chr7  | AC006001.2   | 0,592512388 |

|                    |       |            |             |
|--------------------|-------|------------|-------------|
| ENSG00000279187.1  | chr17 | AC027601.5 | 0,584128498 |
| ENSG00000237523.2  | chr10 | LINC00857  | 0,579429614 |
| ENSG00000205231.1  | chr1  | TTLL10-AS1 | 0,577037616 |
| ENSG00000269439.6  | chr19 | AC010618.4 | 0,575380821 |
| ENSG00000272476.1  | chr6  | AL024507.2 | 0,568321733 |
| ENSG00000237149.5  | chr10 | ZNF503-AS2 | 0,568088178 |
| ENSG00000258634.3  | chr1  | AL160006.1 | 0,558149656 |
| ENSG00000286177.1  | chr19 | AC011462.5 | 0,557326349 |
| ENSG00000257261.6  | chr12 | AC008014.1 | 0,546852211 |
| ENSG00000287431.1  | chr17 | AC027601.6 | 0,545384445 |
| ENSG00000283503.2  | chr18 | LINC01902  | 0,542869182 |
| ENSG00000255248.9  | chr11 | MIR100HG   | 0,538854147 |
| ENSG00000232656.8  | chr10 | IDI2-AS1   | 0,533326072 |
| ENSG00000229807.12 | chrX  | XIST       | 0,530636293 |
| ENSG00000232973.13 | chr2  | CYP1B1-AS1 | 0,525529284 |
| ENSG00000205181.7  | chr20 | LINC00654  | 0,518676946 |
| ENSG00000204054.14 | chr9  | LINC00963  | 0,5120009   |
| ENSG00000203993.5  | chr9  | ARRDC1-AS1 | 0,508495282 |
| ENSG00000237036.5  | chr10 | ZEB1-AS1   | 0,506173826 |
| ENSG00000231437.3  | chr1  | LINC01750  | 0,503017073 |
| ENSG00000228223.3  | chr6  | HCG11      | 0,502113896 |
| ENSG00000282057.1  | chr1  | AC092807.3 | 0,500965379 |
| ENSG00000271614.1  | chr12 | ATP2B1-AS1 | 0,497965682 |
| ENSG00000226445.2  | chr6  | BX322234.1 | 0,496733925 |
| ENSG00000212978.6  | chr2  | AC016747.1 | 0,486309553 |
| ENSG00000283445.1  | chr1  | AL136985.3 | 0,479334826 |
| ENSG00000266010.2  | chr18 | GATA6-AS1  | 0,477460203 |
| ENSG00000234456.8  | chr7  | MAGI2-AS3  | 0,477113274 |
| ENSG00000287263.1  | chr5  | AC008875.3 | 0,475236848 |
| ENSG00000235437.8  | chrX  | LINC01278  | 0,471749298 |
| ENSG00000260917.1  | chr10 | AL158212.3 | 0,465815164 |
| ENSG00000196756.13 | chr20 | SNHG17     | 0,462762294 |
| ENSG00000231074.9  | chr6  | HCG18      | 0,4569292   |
| ENSG00000268635.2  | chr11 | AP003680.1 | 0,456841875 |
| ENSG00000286134.2  | chr5  | AC114930.1 | 0,455834437 |
| ENSG00000280152.1  | chr16 | AC009078.3 | 0,447025788 |
| ENSG00000258912.2  | chr14 | LINC02316  | 0,442898187 |
| ENSG00000272888.7  | chr15 | LINC01578  | 0,442000673 |
| ENSG00000259642.2  | chr15 | ST20-AS1   | 0,43249044  |
| ENSG00000260630.7  | chr16 | SNAI3-AS1  | 0,423906994 |
| ENSG00000264247.2  | chr18 | LINC00909  | 0,421744001 |
| ENSG00000231721.7  | chr7  | LINC-PINT  | 0,421182534 |
| ENSG00000177406.5  | chr12 | AC021054.1 | 0,41902365  |
| ENSG00000222041.11 | chr2  | CYTOR      | 0,412370035 |
| ENSG00000196810.5  | chr4  | CTBP1-DT   | 0,407942817 |
| ENSG00000257621.8  | chr14 | PSMA3-AS1  | 0,387924282 |
| ENSG00000250007.7  | chr15 | AC087457.1 | 0,384629824 |
| ENSG00000259972.3  | chr16 | AC009120.2 | 0,378452415 |
| ENSG00000277287.1  | chr20 | AL109976.1 | 0,370862923 |

|                    |       |             |             |
|--------------------|-------|-------------|-------------|
| ENSG00000245694.10 | chr16 | CRNDE       | 0,367679155 |
| ENSG00000183250.12 | chr21 | LINC01547   | 0,363857409 |
| ENSG00000172965.16 | chr2  | MIR4435-2HG | 0,354597862 |
| ENSG00000235979.9  | chr17 | AC004448.2  | 0,336016314 |
| ENSG00000254860.6  | chr11 | TMEM9B-AS1  | 0,334590177 |
| ENSG00000197536.11 | chr5  | C5orf56     | 0,333329394 |
| ENSG00000286502.1  | chr9  | AL645768.1  | 0,327749213 |
| ENSG00000284669.1  | chr3  | AC092053.3  | 0,323529875 |
| ENSG00000247556.6  | chr15 | OIP5-AS1    | 0,323208872 |
| ENSG00000235513.2  | chr22 | AL035681.1  | 0,321874423 |
| ENSG00000250056.7  | chr5  | LINC01018   | 0,306568489 |
| ENSG00000287151.1  | chr2  | C2orf27A    | 0,304375299 |
| ENSG00000177822.8  | chr4  | TENM3-AS1   | 0,304069135 |

**Table S2.** Total RNA-seq identified 517 lncRNAs in human adipose-derived stem cells (hASC).

| GeneID          | Chr   | Gene_Name  | Log10(TPM)  |
|-----------------|-------|------------|-------------|
| ENSG00000259001 | chr14 | AL355075.4 | 4,923098404 |
| ENSG00000269900 | chr9  | RMRP       | 4,442717312 |
| ENSG00000251562 | chr11 | MALAT1     | 3,628022855 |
| ENSG00000276232 | chr12 | AC006064.5 | 3,319720186 |
| ENSG00000270066 | chr1  | AL356488.2 | 2,91994614  |
| ENSG00000242125 | chr1  | SNHG3      | 2,797276004 |
| ENSG00000130600 | chr11 | H19        | 2,753565136 |
| ENSG00000270022 | chr22 | Z93241.1   | 2,363696846 |
| ENSG00000276107 | chr15 | AC037198.1 | 2,363102321 |
| ENSG00000260032 | chr20 | NORAD      | 2,218462437 |
| ENSG00000248187 | chr4  | AC078850.1 | 2,200073239 |
| ENSG00000270141 | chr3  | TERC       | 2,190171796 |
| ENSG00000254911 | chr11 | SCARNA9    | 2,07945328  |
| ENSG00000261061 | chr16 | AC092718.4 | 2,070635689 |
| ENSG00000175061 | chr17 | SNHG29     | 2,059659307 |
| ENSG00000262202 | chr17 | AC007952.4 | 2,017513145 |
| ENSG00000260025 | chr2  | CRIM1-DT   | 2,010970845 |
| ENSG00000177410 | chr20 | ZFAS1      | 2,000106581 |
| ENSG00000234741 | chr1  | GAS5       | 1,996370173 |
| ENSG00000224259 | chr1  | LINC01133  | 1,994058605 |
| ENSG00000245532 | chr11 | NEAT1      | 1,892656718 |
| ENSG00000225733 | chr3  | FGD5-AS1   | 1,845224745 |
| ENSG00000230630 | chr1  | DNM3OS     | 1,818038368 |
| ENSG00000270103 | chr1  | AL360012.1 | 1,808820623 |
| ENSG00000203875 | chr6  | SNHG5      | 1,802321565 |
| ENSG00000245910 | chr8  | SNHG6      | 1,798708414 |
| ENSG00000276216 | chr1  | AC245014.3 | 1,795271    |
| ENSG00000186594 | chr17 | MIR22HG    | 1,769065451 |
| ENSG00000232533 | chr7  | AC093673.1 | 1,73125492  |
| ENSG00000275180 | chr12 | AC048341.2 | 1,717526714 |
| ENSG00000255717 | chr11 | SNHG1      | 1,712684226 |
| ENSG00000269958 | chr14 | AL049840.4 | 1,703930679 |
| ENSG00000270069 | chrX  | MIR222HG   | 1,662229433 |

|                 |       |              |             |
|-----------------|-------|--------------|-------------|
| ENSG00000265519 | chr17 | AC015922.2   | 1,638008495 |
| ENSG00000223749 | chrX  | MIR503HG     | 1,609261126 |
| ENSG00000251022 | chr4  | THAP9-AS1    | 1,486036364 |
| ENSG00000254635 | chr10 | WAC-AS1      | 1,477714049 |
| ENSG00000287001 | chr19 | AC010624.5   | 1,473932361 |
| ENSG00000260260 | chr16 | SNHG19       | 1,457458775 |
| ENSG00000269902 | chrX  | AC234772.2   | 1,44338281  |
| ENSG00000247556 | chr15 | OIP5-AS1     | 1,436525646 |
| ENSG00000163597 | chr17 | SNHG16       | 1,432447103 |
| ENSG00000274654 | chr15 | AC022467.1   | 1,427273715 |
| ENSG00000285090 | chr7  | AC002074.1   | 1,413340093 |
| ENSG00000255248 | chr11 | MIR100HG     | 1,39725025  |
| ENSG00000253352 | chr22 | TUG1         | 1,394891005 |
| ENSG00000269652 | chr19 | AC011510.1   | 1,386179835 |
| ENSG00000272888 | chr15 | LINC01578    | 1,384991004 |
| ENSG00000282849 | chr1  | AL359834.1   | 1,35806034  |
| ENSG00000269893 | chr4  | SNHG8        | 1,351534553 |
| ENSG00000280206 | chr16 | AC026401.3   | 1,347046291 |
| ENSG00000266402 | chr17 | SNHG25       | 1,327145163 |
| ENSG00000237892 | chr2  | KLF7-IT1     | 1,324031928 |
| ENSG00000214548 | chr14 | MEG3         | 1,315076306 |
| ENSG00000264577 | chr17 | AC010761.2   | 1,291958712 |
| ENSG00000249669 | chr5  | CARMN        | 1,290337921 |
| ENSG00000279602 | chr17 | AC109326.1   | 1,269455036 |
| ENSG00000224468 | chr1  | LAMC1-AS1    | 1,261744511 |
| ENSG00000282057 | chr1  | AC092807.3   | 1,258247479 |
| ENSG00000229847 | chr10 | EMX2OS       | 1,253720045 |
| ENSG00000273186 | chr9  | AL359091.5   | 1,250127715 |
| ENSG00000204620 | chrX  | AC115618.1   | 1,237672097 |
| ENSG00000224032 | chr5  | EPB41L4A-AS1 | 1,235742813 |
| ENSG00000286242 | chr4  | AC018797.3   | 1,224346016 |
| ENSG00000286153 | chr21 | AP000331.1   | 1,220807301 |
| ENSG00000277382 | chr17 | AC005837.3   | 1,200104355 |
| ENSG00000263826 | chr3  | AC112907.3   | 1,199093191 |
| ENSG00000254165 | chr8  | AC090739.1   | 1,190002014 |
| ENSG00000229915 | chr2  | AC016999.1   | 1,187407433 |
| ENSG00000230074 | chr9  | AL162231.2   | 1,18284166  |
| ENSG00000280128 | chr6  | AL662795.2   | 1,177552189 |
| ENSG00000228223 | chr6  | HCG11        | 1,16779908  |
| ENSG00000281649 | chr9  | EBLN3P       | 1,165305025 |
| ENSG00000278730 | chr17 | AC005332.6   | 1,159530367 |
| ENSG00000268205 | chr19 | AC005261.2   | 1,15946483  |
| ENSG00000257732 | chr12 | AC089983.1   | 1,150411768 |
| ENSG00000233016 | chr9  | SNHG7        | 1,149182018 |
| ENSG00000246859 | chr5  | STARD4-AS1   | 1,148970913 |
| ENSG00000223813 | chr7  | AC007255.1   | 1,14763918  |
| ENSG00000234456 | chr7  | MAGI2-AS3    | 1,147561964 |
| ENSG00000232956 | chr7  | SNHG15       | 1,146947238 |
| ENSG00000261220 | chr8  | AC103706.1   | 1,145374667 |

|                 |       |                 |             |
|-----------------|-------|-----------------|-------------|
| ENSG00000197989 | chr1  | SNHG12          | 1,13413268  |
| ENSG00000224870 | chr1  | MRPL20-AS1      | 1,117326338 |
| ENSG00000257621 | chr14 | PSMA3-AS1       | 1,11180622  |
| ENSG00000260604 | chr6  | AL590004.3      | 1,110710974 |
| ENSG00000250786 | chr5  | SNHG18          | 1,105656666 |
| ENSG00000273568 | chr12 | AC131009.3      | 1,096598952 |
| ENSG00000197182 | chr22 | MIRLET7BHG      | 1,093013987 |
| ENSG00000288066 | chr2  | AC097448.1      | 1,091762063 |
| ENSG00000258667 | chr14 | HIF1A-AS2       | 1,089814701 |
| ENSG00000246763 | chr5  | RGMB-AS1        | 1,089790825 |
| ENSG00000163364 | chr2  | LINC01116       | 1,084604756 |
| ENSG00000224959 | chr2  | AC017002.1      | 1,082347398 |
| ENSG00000257256 | chr12 | AC008147.1      | 1,079320295 |
| ENSG00000241211 | chr3  | IQCJ-SCHIP1-AS1 | 1,076755028 |
| ENSG00000253738 | chr8  | OTUD6B-AS1      | 1,074026855 |
| ENSG00000228261 | chr10 | ITPRIP-AS1      | 1,072837335 |
| ENSG00000272923 | chr16 | AC092139.1      | 1,064708678 |
| ENSG00000230499 | chr2  | AC108463.2      | 1,06131723  |
| ENSG00000226380 | chr7  | AC016831.1      | 1,047307591 |
| ENSG00000272482 | chr1  | AC254633.1      | 1,041485338 |
| ENSG00000270039 | chr12 | AC025165.5      | 1,039225344 |
| ENSG00000223485 | chr6  | LINC01615       | 1,035784638 |
| ENSG00000258777 | chr14 | HIF1A-AS1       | 1,034829139 |
| ENSG00000287287 | chr9  | AL133476.1      | 1,033997316 |
| ENSG00000226876 | chr1  | AC092801.1      | 1,023001932 |
| ENSG00000258096 | chr12 | AC025031.2      | 1,018126081 |
| ENSG00000267519 | chr19 | AC020916.1      | 1,017518546 |
| ENSG00000275560 | chr12 | AC008115.3      | 1,015823347 |
| ENSG00000273264 | chr1  | AL360219.1      | 1,015823347 |
| ENSG00000286696 | chr15 | AC090826.3      | 1,011503693 |
| ENSG00000279348 | chr2  | AC012513.3      | 1,011353489 |
| ENSG00000265415 | chr17 | AC099850.3      | 1,007858593 |
| ENSG00000272086 | chr5  | AC025181.2      | 1,005318289 |
| ENSG00000271811 | chr1  | Z97200.1        | 1,004564691 |
| ENSG00000225746 | chr14 | MEG8            | 1,002207181 |
| ENSG00000264112 | chr17 | AC015813.1      | 1,002186091 |
| ENSG00000278974 | chr4  | AC093909.6      | 0,99702309  |
| ENSG00000246451 | chr14 | AL049840.1      | 0,989578177 |
| ENSG00000275764 | chr12 | AC092747.4      | 0,988784006 |
| ENSG00000245694 | chr16 | CRNDE           | 0,988667768 |
| ENSG00000203644 | chr3  | AC083799.1      | 0,988239826 |
| ENSG00000255893 | chr11 | AP000786.1      | 0,983101669 |
| ENSG00000235531 | chr8  | MSC-AS1         | 0,981760253 |
| ENSG00000254461 | chr11 | AP001107.4      | 0,981609247 |
| ENSG00000269825 | chr19 | AC022150.4      | 0,980081653 |
| ENSG00000269906 | chr14 | AL606834.1      | 0,97637672  |
| ENSG00000232527 | chr1  | AC245595.1      | 0,967954366 |
| ENSG00000272841 | chr6  | AL139393.3      | 0,957126153 |
| ENSG00000229807 | chrX  | XIST            | 0,955120207 |

|                 |       |             |             |
|-----------------|-------|-------------|-------------|
| ENSG00000246430 | chr8  | LINC00968   | 0,951866954 |
| ENSG00000223764 | chr1  | LINC02593   | 0,951287251 |
| ENSG00000261553 | chr13 | AL137782.1  | 0,949808202 |
| ENSG00000279123 | chr16 | AC027281.2  | 0,948063653 |
| ENSG00000271737 | chr5  | AC008608.2  | 0,947976646 |
| ENSG00000255565 | chr12 | AC073651.1  | 0,946613586 |
| ENSG00000242588 | chr7  | AC108010.1  | 0,942699926 |
| ENSG00000250064 | chr4  | AC097480.1  | 0,94137395  |
| ENSG00000203506 | chr3  | RBMS3-AS2   | 0,939461595 |
| ENSG00000270084 | chr1  | GAS5-AS1    | 0,93845233  |
| ENSG00000263753 | chr18 | LINC00667   | 0,937493162 |
| ENSG00000234779 | chr9  | BNC2-AS1    | 0,935626207 |
| ENSG00000172965 | chr2  | MIR4435-2HG | 0,933252769 |
| ENSG00000231721 | chr7  | LINC-PINT   | 0,932418157 |
| ENSG00000261189 | chr6  | AL031058.1  | 0,925847315 |
| ENSG00000276855 | chr17 | AC015922.3  | 0,924515531 |
| ENSG00000212978 | chr2  | AC016747.1  | 0,923078163 |
| ENSG00000235852 | chr2  | AC005540.1  | 0,923009281 |
| ENSG00000260804 | chr2  | LINC01963   | 0,922907217 |
| ENSG00000259721 | chr15 | AC090877.2  | 0,919672727 |
| ENSG00000177337 | chr18 | DLGAP1-AS1  | 0,917594357 |
| ENSG00000287673 | chr18 | AC051635.1  | 0,914121954 |
| ENSG00000254531 | chr4  | AP001816.1  | 0,910704676 |
| ENSG00000236255 | chr2  | AC009404.1  | 0,910452785 |
| ENSG00000250038 | chr4  | AC093791.1  | 0,908823381 |
| ENSG00000284669 | chr3  | AC092053.3  | 0,907133823 |
| ENSG00000287916 | chr3  | AC091607.2  | 0,906885292 |
| ENSG00000266208 | chr17 | AC080112.1  | 0,903422379 |
| ENSG00000274737 | chr12 | AC004466.2  | 0,901416838 |
| ENSG00000206573 | chr3  | THUMP3-AS1  | 0,897470551 |
| ENSG00000254343 | chr8  | AC091563.1  | 0,894972119 |
| ENSG00000273576 | chr17 | AC009283.1  | 0,894683455 |
| ENSG00000286458 | chr7  | AC083870.1  | 0,894132902 |
| ENSG00000250095 | chr5  | NREP-AS1    | 0,892412922 |
| ENSG00000223768 | chr21 | LINC00205   | 0,888515766 |
| ENSG00000258056 | chr12 | AC009779.2  | 0,8849249   |
| ENSG00000227279 | chr18 | AC110015.1  | 0,884699234 |
| ENSG00000248866 | chr4  | USP46-AS1   | 0,883454242 |
| ENSG00000255471 | chr11 | AP001528.2  | 0,881837316 |
| ENSG00000273038 | chr10 | AL365203.2  | 0,877084975 |
| ENSG00000271643 | chr3  | AC112220.2  | 0,876681858 |
| ENSG00000285646 | chr1  | AL021155.2  | 0,876166231 |
| ENSG00000230390 | chr13 | LINC01048   | 0,870883533 |
| ENSG00000241990 | chr22 | PRR34-AS1   | 0,870872495 |
| ENSG00000226950 | chr4  | DANCR       | 0,870862804 |
| ENSG00000260823 | chr16 | AC026461.3  | 0,866980656 |
| ENSG00000264247 | chr18 | LINC00909   | 0,86143323  |
| ENSG00000270504 | chr6  | AL391422.4  | 0,860689126 |
| ENSG00000231290 | chr20 | APCDD1L-DT  | 0,860206781 |

|                 |       |              |             |
|-----------------|-------|--------------|-------------|
| ENSG00000189223 | chr2  | PAX8-AS1     | 0,858350341 |
| ENSG00000287388 | chr12 | AC068774.1   | 0,857800016 |
| ENSG00000286039 | chr4  | AC093849.2   | 0,856582391 |
| ENSG00000229124 | chr10 | VIM-AS1      | 0,853777132 |
| ENSG00000273319 | chr7  | AC058791.1   | 0,850561933 |
| ENSG00000267321 | chr17 | SNHG30       | 0,849897393 |
| ENSG00000260267 | chr16 | AC026471.1   | 0,849629046 |
| ENSG00000234171 | chr2  | RNASEH1-AS1  | 0,848693006 |
| ENSG00000254300 | chr8  | LINC01111    | 0,847432662 |
| ENSG00000238058 | chr9  | AL355574.1   | 0,847427998 |
| ENSG00000273002 | chr1  | AL355388.2   | 0,841440131 |
| ENSG00000279752 | chr5  | AC011389.3   | 0,836349801 |
| ENSG00000238273 | chr2  | AC108058.1   | 0,829244324 |
| ENSG00000259865 | chr1  | AL390728.6   | 0,825110981 |
| ENSG00000250986 | chr4  | LINC02600    | 0,823749382 |
| ENSG00000273129 | chr1  | PACERR       | 0,822551327 |
| ENSG00000228106 | chr1  | AL392172.1   | 0,820648095 |
| ENSG00000253161 | chr8  | LINC01605    | 0,818310885 |
| ENSG00000233429 | chr7  | HOTAIRM1     | 0,816553287 |
| ENSG00000253982 | chr8  | AC100810.1   | 0,814253545 |
| ENSG00000286947 | chr15 | AC022467.2   | 0,814092689 |
| ENSG00000274565 | chr17 | AC080038.2   | 0,812054472 |
| ENSG00000248222 | chr5  | AC011389.1   | 0,807044508 |
| ENSG00000233521 | chr22 | LINC01638    | 0,805347107 |
| ENSG00000273888 | chr14 | FRMD6-AS1    | 0,805225632 |
| ENSG00000274370 | chr17 | AC130371.2   | 0,805162446 |
| ENSG00000257497 | chr12 | AC121761.1   | 0,801543735 |
| ENSG00000269427 | chr19 | AC024075.3   | 0,801424701 |
| ENSG00000239407 | chrX  | Z68871.1     | 0,801280935 |
| ENSG00000237523 | chr10 | LINC00857    | 0,79959253  |
| ENSG00000269951 | chr15 | AC090181.2   | 0,79769265  |
| ENSG00000248869 | chr4  | LINC02511    | 0,796126421 |
| ENSG00000257354 | chr12 | AC048341.1   | 0,793102213 |
| ENSG00000234608 | chr12 | MAPKAPK5-AS1 | 0,788661706 |
| ENSG00000249378 | chr4  | LINC01060    | 0,78805938  |
| ENSG00000255135 | chr11 | AP002360.1   | 0,784667849 |
| ENSG00000215039 | chr12 | CD27-AS1     | 0,783823179 |
| ENSG00000268403 | chr11 | AC132192.2   | 0,78298245  |
| ENSG00000226696 | chr19 | LENG8-AS1    | 0,780094518 |
| ENSG00000280798 | chr11 | LINC00294    | 0,777856932 |
| ENSG00000279819 | chr10 | AL390318.1   | 0,777109802 |
| ENSG00000286388 | chr5  | AC026748.3   | 0,77606647  |
| ENSG00000272335 | chr5  | AC093297.2   | 0,774407061 |
| ENSG00000279713 | chr17 | AC080038.4   | 0,769948617 |
| ENSG00000245937 | chr5  | LINC01184    | 0,76657327  |
| ENSG00000227248 | chr13 | FAM155A-IT1  | 0,762930544 |
| ENSG00000263272 | chr17 | AC004148.2   | 0,760954025 |
| ENSG00000279453 | chr6  | Z99129.4     | 0,760354608 |
| ENSG00000203993 | chr9  | ARRDC1-AS1   | 0,758943002 |

|                 |       |            |             |
|-----------------|-------|------------|-------------|
| ENSG00000261490 | chr4  | AC005674.2 | 0,758728183 |
| ENSG00000248008 | chr12 | NRAV       | 0,758434832 |
| ENSG00000279118 | chr5  | AC093535.2 | 0,756762767 |
| ENSG00000248927 | chr5  | AC114284.1 | 0,754267992 |
| ENSG00000230551 | chr5  | AC021078.1 | 0,753207279 |
| ENSG00000206195 | chr22 | DUXAP8     | 0,750392093 |
| ENSG00000232774 | chr14 | AL355916.1 | 0,748327662 |
| ENSG00000245571 | chr11 | FAM111A-DT | 0,746404981 |
| ENSG00000177335 | chr8  | C8orf31    | 0,746051046 |
| ENSG00000279041 | chr8  | AC102945.2 | 0,745163599 |
| ENSG00000279530 | chr12 | AC092881.2 | 0,744724793 |
| ENSG00000171889 | chr9  | MIR31HG    | 0,7365092   |
| ENSG00000232931 | chr2  | LINC00342  | 0,735936953 |
| ENSG00000174365 | chr20 | SNHG11     | 0,732871334 |
| ENSG00000260708 | chr22 | AL118516.1 | 0,728406047 |
| ENSG00000231074 | chr6  | HCG18      | 0,726114993 |
| ENSG00000267100 | chr19 | ILF3-DT    | 0,725679218 |
| ENSG00000257671 | chr12 | KRT7-AS    | 0,7237639   |
| ENSG00000279088 | chr10 | AC022400.8 | 0,723375151 |
| ENSG00000260917 | chr10 | AL158212.3 | 0,722279329 |
| ENSG00000266709 | chr17 | AC005224.3 | 0,718805742 |
| ENSG00000272221 | chr6  | AL645933.2 | 0,712146674 |
| ENSG00000269044 | chr19 | AC024075.2 | 0,712131682 |
| ENSG00000228649 | chr7  | SNHG26     | 0,710007958 |
| ENSG00000272768 | chr7  | AC004854.2 | 0,709435991 |
| ENSG00000281183 | chr15 | NPTN-IT1   | 0,705888706 |
| ENSG00000287151 | chr2  | C2orf27A   | 0,702555395 |
| ENSG00000281195 | chr2  | AC007878.1 | 0,701320131 |
| ENSG00000177738 | chr5  | AC025171.1 | 0,70017777  |
| ENSG00000250280 | chr12 | AC026124.1 | 0,699146401 |
| ENSG00000276170 | chr17 | AC244153.1 | 0,697639358 |
| ENSG00000240350 | chr2  | AC017002.3 | 0,697349462 |
| ENSG00000233223 | chr17 | AC016876.1 | 0,696036202 |
| ENSG00000256073 | chr21 | URB1-AS1   | 0,694465515 |
| ENSG00000258441 | chr14 | LINC00641  | 0,690867334 |
| ENSG00000255284 | chr11 | AP006621.3 | 0,688956325 |
| ENSG00000254473 | chr9  | AL354920.1 | 0,684392221 |
| ENSG00000260597 | chr12 | AC012531.1 | 0,681226969 |
| ENSG00000223653 | chr1  | AL078459.1 | 0,679028361 |
| ENSG00000260257 | chr20 | AL035071.1 | 0,676689715 |
| ENSG00000271533 | chrX  | Z83843.1   | 0,676672528 |
| ENSG00000262454 | chr16 | MIR193BHG  | 0,675887252 |
| ENSG00000254554 | chr11 | AC080023.1 | 0,674588888 |
| ENSG00000272288 | chr6  | AL451165.2 | 0,673863223 |
| ENSG00000280120 | chr12 | AC073857.1 | 0,672259179 |
| ENSG00000224975 | chrX  | INE1       | 0,670819414 |
| ENSG00000285928 | chr1  | AC103591.4 | 0,666564571 |
| ENSG00000272695 | chr13 | GAS6-DT    | 0,664504668 |
| ENSG00000287086 | chr3  | AC034193.1 | 0,661274096 |



|                 |       |            |             |
|-----------------|-------|------------|-------------|
| ENSG00000278864 | chr17 | AC055811.4 | 0,659785935 |
| ENSG00000287787 | chr16 | AC092275.1 | 0,659058303 |
| ENSG00000258634 | chr1  | AL160006.1 | 0,658172718 |
| ENSG00000268858 | chr20 | AL118506.1 | 0,658020939 |
| ENSG00000271122 | chr7  | AC018647.2 | 0,657431217 |
| ENSG00000259649 | chr15 | AC027808.2 | 0,656578975 |
| ENSG00000179523 | chr15 | EIF3J-DT   | 0,655067069 |
| ENSG00000248092 | chr5  | NNT-AS1    | 0,654382377 |
| ENSG00000261888 | chr17 | AC144831.1 | 0,651852305 |
| ENSG00000232855 | chr21 | AF165147.1 | 0,65131235  |
| ENSG00000286141 | chr4  | AC097480.2 | 0,650026478 |
| ENSG00000261105 | chr13 | LMO7-AS1   | 0,648660992 |
| ENSG00000225721 | chr1  | AL592166.1 | 0,644490475 |
| ENSG00000257167 | chr12 | TMPO-AS1   | 0,643178627 |
| ENSG00000286735 | chr3  | AC126182.3 | 0,642197797 |
| ENSG00000228630 | chr12 | HOTAIR     | 0,641118395 |
| ENSG00000279059 | chr17 | AC007485.2 | 0,639915423 |
| ENSG00000250742 | chr12 | LINC02381  | 0,639227124 |
| ENSG00000287839 | chr1  | AL353807.5 | 0,638979546 |
| ENSG00000259498 | chr15 | TPM1-AS    | 0,63731796  |
| ENSG00000260231 | chr7  | KDM7A-DT   | 0,636918149 |
| ENSG00000268471 | chr4  | MIR4453HG  | 0,635785789 |
| ENSG00000204054 | chr9  | LINC00963  | 0,635253803 |
| ENSG00000286873 | chr2  | AC012306.3 | 0,6323954   |
| ENSG00000286532 | chr2  | PARTICL    | 0,632210965 |
| ENSG00000187951 | chr15 | AC091057.1 | 0,629888744 |
| ENSG00000273007 | chr4  | AC021205.3 | 0,629007323 |
| ENSG00000225434 | chr9  | LINC01504  | 0,626361758 |
| ENSG00000253837 | chr8  | AC090197.1 | 0,625242917 |
| ENSG00000214401 | chr17 | KANSL1-AS1 | 0,624616721 |
| ENSG00000270194 | chr3  | AC097359.2 | 0,622509388 |
| ENSG00000269439 | chr19 | AC010618.4 | 0,619452478 |
| ENSG00000278996 | chr21 | FP671120.2 | 0,618377632 |
| ENSG00000233117 | chr10 | LINC00702  | 0,617740094 |
| ENSG00000225177 | chr6  | AL590617.2 | 0,614399767 |
| ENSG00000235919 | chr1  | ASH1L-AS1  | 0,612673489 |
| ENSG00000223960 | chr2  | PRKRA-AS1  | 0,612135418 |
| ENSG00000259426 | chr15 | AC027237.4 | 0,611787146 |
| ENSG00000269973 | chr2  | AC010969.2 | 0,610574987 |
| ENSG00000265688 | chr17 | MAFG-DT    | 0,608715578 |
| ENSG00000231106 | chr21 | LINC01436  | 0,604700641 |
| ENSG00000228393 | chr7  | LINC01004  | 0,600048808 |
| ENSG00000255874 | chr13 | LINC00346  | 0,597148719 |
| ENSG00000261801 | chr15 | LOXL1-AS1  | 0,596084218 |
| ENSG00000253854 | chr8  | AC010834.3 | 0,594404384 |
| ENSG00000235927 | chr1  | NEXN-AS1   | 0,592206245 |
| ENSG00000177822 | chr4  | TENM3-AS1  | 0,592132286 |
| ENSG00000234428 | chr12 | AC023051.1 | 0,585647804 |
| ENSG00000222041 | chr2  | CYTOR      | 0,585432973 |

|                 |       |             |             |
|-----------------|-------|-------------|-------------|
| ENSG00000196756 | chr20 | SNHG17      | 0,581975219 |
| ENSG00000239332 | chr2  | LINC01119   | 0,580724858 |
| ENSG00000231770 | chr3  | TMEM44-AS1  | 0,578573605 |
| ENSG00000251432 | chr4  | LINC02615   | 0,577768509 |
| ENSG00000236304 | chr11 | AP001189.1  | 0,576452583 |
| ENSG00000229619 | chr3  | MBNL1-AS1   | 0,575949427 |
| ENSG00000261786 | chr3  | AC006058.1  | 0,575929603 |
| ENSG00000271895 | chr1  | AL109811.2  | 0,574844373 |
| ENSG00000225032 | chr9  | AL162586.1  | 0,574488847 |
| ENSG00000231187 | chr10 | AL356056.2  | 0,569287312 |
| ENSG00000281026 | chr13 | N4BP2L2-IT2 | 0,56922152  |
| ENSG00000221949 | chr12 | LINC01465   | 0,567709115 |
| ENSG00000268912 | chr19 | AC012313.5  | 0,566601389 |
| ENSG00000254510 | chr11 | AP001107.5  | 0,565940471 |
| ENSG00000257298 | chr12 | AC008147.2  | 0,56454834  |
| ENSG00000215808 | chr1  | LINC01139   | 0,56336183  |
| ENSG00000267745 | chr17 | AC060766.7  | 0,562748603 |
| ENSG00000279881 | chr8  | AC041040.1  | 0,560753717 |
| ENSG00000285967 | chr5  | NIPBL-DT    | 0,560102946 |
| ENSG00000250899 | chr12 | AC125807.2  | 0,559985545 |
| ENSG00000259456 | chr20 | ADNP-AS1    | 0,558528945 |
| ENSG00000233901 | chr9  | LINC01503   | 0,55817718  |
| ENSG00000280195 | chrX  | AC245140.2  | 0,554968059 |
| ENSG00000205885 | chr12 | C1RL-AS1    | 0,554069828 |
| ENSG00000215256 | chr14 | DHRS4-AS1   | 0,551247138 |
| ENSG00000271590 | chr2  | AC108463.3  | 0,551123733 |
| ENSG00000234494 | chr17 | SP2-AS1     | 0,543989073 |
| ENSG00000230590 | chrX  | FTX         | 0,540745539 |
| ENSG00000236540 | chr22 | AC006547.1  | 0,536782132 |
| ENSG00000286360 | chr2  | AC107081.4  | 0,534885293 |
| ENSG00000226328 | chr22 | NUP50-DT    | 0,534534167 |
| ENSG00000244161 | chr3  | FLNB-AS1    | 0,532926345 |
| ENSG00000286067 | chr12 | AC004263.2  | 0,532747662 |
| ENSG00000274828 | chr18 | AC068473.5  | 0,532686984 |
| ENSG00000223745 | chr1  | CCDC18-AS1  | 0,532261794 |
| ENSG00000251314 | chr5  | AC104123.1  | 0,531640238 |
| ENSG00000285410 | chr15 | GABPB1-IT1  | 0,531273652 |
| ENSG00000262879 | chr17 | AC005670.3  | 0,531064529 |
| ENSG00000231172 | chr2  | AC007099.1  | 0,529067178 |
| ENSG00000215014 | chr1  | AL645728.1  | 0,527180179 |
| ENSG00000280721 | chr2  | LINC01943   | 0,52630777  |
| ENSG00000243107 | chr7  | AC000120.1  | 0,520848039 |
| ENSG00000205181 | chr20 | LINC00654   | 0,508287525 |
| ENSG00000224743 | chr13 | TEX26-AS1   | 0,505952731 |
| ENSG00000223652 | chr5  | AC106786.1  | 0,505763454 |
| ENSG00000257698 | chr12 | GIHCG       | 0,504595001 |
| ENSG00000279541 | chr19 | AC005261.6  | 0,504174762 |
| ENSG00000287581 | chr5  | AC016549.1  | 0,503495886 |
| ENSG00000279636 | chr14 | AL132989.2  | 0,502942459 |

|                 |       |                |             |
|-----------------|-------|----------------|-------------|
| ENSG00000287038 | chr9  | AL162388.2     | 0,497741112 |
| ENSG00000235513 | chr22 | AL035681.1     | 0,496279848 |
| ENSG00000231365 | chr1  | WARS2-AS1      | 0,496230758 |
| ENSG00000280088 | chr12 | AC126474.2     | 0,495967227 |
| ENSG00000254837 | chr11 | AP001372.2     | 0,495511373 |
| ENSG00000204758 | chr5  | AC008429.1     | 0,492770989 |
| ENSG00000203721 | chr1  | LINC00862      | 0,491523015 |
| ENSG00000249673 | chr4  | NOP14-AS1      | 0,491363377 |
| ENSG00000246089 | chr8  | AC016065.1     | 0,490040274 |
| ENSG00000245522 | chr11 | AC026250.1     | 0,489206772 |
| ENSG00000260920 | chr1  | AL031985.3     | 0,485271496 |
| ENSG00000268516 | chr19 | AC020915.3     | 0,482447875 |
| ENSG00000287222 | chr8  | AC234917.3     | 0,482331254 |
| ENSG00000236144 | chr19 | TMEM147-AS1    | 0,477253145 |
| ENSG00000245849 | chr15 | RAD51-AS1      | 0,475842811 |
| ENSG00000270820 | chr2  | AC016727.1     | 0,473674045 |
| ENSG00000245970 | chr8  | AP003352.1     | 0,472555176 |
| ENSG00000271147 | chrX  | ARMCX5-GPRASP2 | 0,470773518 |
| ENSG00000198496 | chr17 | NBR2           | 0,468405895 |
| ENSG00000203804 | chr1  | ADAMTSL4-AS1   | 0,467692105 |
| ENSG00000233559 | chr7  | LINC00513      | 0,465239617 |
| ENSG00000276517 | chr2  | AL133243.3     | 0,464380096 |
| ENSG00000257027 | chr12 | AC010186.3     | 0,462523491 |
| ENSG00000250602 | chr5  | AC093535.1     | 0,461538234 |
| ENSG00000226137 | chr17 | BAIAP2-DT      | 0,461481794 |
| ENSG00000204685 | chr2  | STARD7-AS1     | 0,461053375 |
| ENSG00000260565 | chr16 | ERV13-1        | 0,460557521 |
| ENSG00000241316 | chr3  | SUCLG2-AS1     | 0,459692625 |
| ENSG00000280042 | chr3  | AC022336.3     | 0,457416448 |
| ENSG00000269929 | chr9  | AL158152.1     | 0,457192494 |
| ENSG00000214106 | chr7  | PAXIP1-AS2     | 0,456606009 |
| ENSG00000262001 | chr18 | DLGAP1-AS2     | 0,456304141 |
| ENSG00000271862 | chr5  | AC104118.1     | 0,455346491 |
| ENSG00000234327 | chr17 | AC012146.1     | 0,453064763 |
| ENSG00000268001 | chr19 | CARD8-AS1      | 0,453032086 |
| ENSG00000249035 | chr5  | CLMAT3         | 0,452543395 |
| ENSG00000267325 | chr18 | LINC01415      | 0,451753205 |
| ENSG00000259705 | chr15 | AC084757.3     | 0,450532475 |
| ENSG00000255455 | chr11 | AP003486.1     | 0,446899737 |
| ENSG00000273108 | chr10 | AL121929.2     | 0,446842511 |
| ENSG00000257261 | chr12 | AC008014.1     | 0,446241073 |
| ENSG00000286964 | chrX  | AL136169.1     | 0,446133727 |
| ENSG00000257221 | chr12 | AC007569.1     | 0,445674296 |
| ENSG00000236859 | chr2  | NIFK-AS1       | 0,441515885 |
| ENSG00000259687 | chr14 | LINC01220      | 0,434126314 |
| ENSG00000279369 | chr17 | AC046185.3     | 0,434074956 |
| ENSG00000273033 | chr3  | LINC02035      | 0,433757605 |
| ENSG00000232656 | chr10 | IDI2-AS1       | 0,432714934 |
| ENSG00000196810 | chr4  | CTBP1-DT       | 0,430825175 |

|                 |       |            |             |
|-----------------|-------|------------|-------------|
| ENSG00000228060 | chr1  | PABPC4-AS1 | 0,430701778 |
| ENSG00000279940 | chr12 | AC073862.3 | 0,429294015 |
| ENSG00000233818 | chr21 | AP000695.2 | 0,428977896 |
| ENSG00000260910 | chr13 | LINC00565  | 0,42631167  |
| ENSG00000287263 | chr5  | AC008875.3 | 0,426258912 |
| ENSG00000279390 | chr21 | AF127577.6 | 0,422722244 |
| ENSG00000244625 | chr22 | MIATNB     | 0,422384597 |
| ENSG00000272129 | chr6  | AL359715.3 | 0,422149993 |
| ENSG00000278341 | chr16 | AC138028.6 | 0,420355453 |
| ENSG00000267397 | chr18 | AC090229.1 | 0,418505879 |
| ENSG00000255043 | chr11 | NAV2-AS5   | 0,417214068 |
| ENSG00000265778 | chr18 | AC018413.1 | 0,417061811 |
| ENSG00000196741 | chrX  | LINC01560  | 0,416412555 |
| ENSG00000280239 | chr19 | AC011498.7 | 0,415118188 |
| ENSG00000230623 | chr1  | AC104461.1 | 0,413087522 |
| ENSG00000278970 | chr5  | HEIH       | 0,411987098 |
| ENSG00000275481 | chr12 | AC025031.4 | 0,411411375 |
| ENSG00000246090 | chr4  | AP002026.1 | 0,410739333 |
| ENSG00000273218 | chr19 | AC005776.2 | 0,408742555 |
| ENSG00000183562 | chr11 | AC131971.1 | 0,408456229 |
| ENSG00000225791 | chr6  | TRAM2-AS1  | 0,404322355 |
| ENSG00000276334 | chr2  | AL133243.2 | 0,404283524 |
| ENSG00000224093 | chr1  | AL109613.1 | 0,404175231 |
| ENSG00000279207 | chr17 | AC015813.6 | 0,398854411 |
| ENSG00000260645 | chr6  | AL359715.2 | 0,395021942 |
| ENSG00000242622 | chr3  | AC092910.3 | 0,394747479 |
| ENSG00000262265 | chr17 | AC002558.3 | 0,393916831 |
| ENSG00000279089 | chr17 | AC005839.1 | 0,39115247  |
| ENSG00000246695 | chr12 | RASSF8-AS1 | 0,39091292  |
| ENSG00000244879 | chr15 | GABPB1-AS1 | 0,390064044 |
| ENSG00000280187 | chr5  | AC022107.1 | 0,389814119 |
| ENSG00000278948 | chr22 | AL031587.5 | 0,389533477 |
| ENSG00000251136 | chr8  | AF117829.1 | 0,388325592 |
| ENSG00000235770 | chr2  | LINC00607  | 0,387343384 |
| ENSG00000233251 | chr2  | AC007743.1 | 0,386941261 |
| ENSG00000280339 | chr11 | AP001528.3 | 0,386313484 |
| ENSG00000284968 | chr4  | AC093827.4 | 0,381868797 |
| ENSG00000230487 | chr7  | PSMG3-AS1  | 0,381703231 |
| ENSG00000270959 | chr3  | LPP-AS2    | 0,380765768 |
| ENSG00000226824 | chr7  | AC006001.2 | 0,380521195 |
| ENSG00000263731 | chr17 | AC145207.5 | 0,379872994 |
| ENSG00000272711 | chr2  | AC019069.1 | 0,375293037 |
| ENSG00000269834 | chr19 | ZNF528-AS1 | 0,374867197 |
| ENSG00000260578 | chr18 | AC110597.1 | 0,372379787 |
| ENSG00000267058 | chr19 | AC006213.2 | 0,37215938  |
| ENSG00000180769 | chr4  | WDFY3-AS2  | 0,372011589 |
| ENSG00000255176 | chr11 | AP000941.1 | 0,37197416  |
| ENSG00000253210 | chr8  | AC040970.1 | 0,371756781 |
| ENSG00000269506 | chr4  | AC110792.2 | 0,371400903 |

|                 |       |            |             |
|-----------------|-------|------------|-------------|
| ENSG00000287769 | chr9  | AL353748.3 | 0,369919857 |
| ENSG00000231607 | chr13 | DLEU2      | 0,366870158 |
| ENSG00000224577 | chr2  | LINC01117  | 0,364309289 |
| ENSG00000261542 | chr8  | AC011978.2 | 0,363614007 |
| ENSG00000245573 | chr11 | BDNF-AS    | 0,361814661 |
| ENSG00000177406 | chr12 | AC021054.1 | 0,361637666 |
| ENSG00000278376 | chr11 | AP004609.3 | 0,36070489  |
| ENSG00000277534 | chr18 | AC007996.1 | 0,357928681 |
| ENSG00000286473 | chr16 | AC133485.7 | 0,357925234 |
| ENSG00000279821 | chr5  | AC145098.2 | 0,355046365 |
| ENSG00000249592 | chr4  | AC139887.2 | 0,353592065 |
| ENSG00000196295 | chr7  | GARS-DT    | 0,35263745  |
| ENSG00000259768 | chr16 | AC004943.2 | 0,352446863 |
| ENSG00000224189 | chr2  | HAGLR      | 0,351158469 |
| ENSG00000279342 | chr11 | AP000866.6 | 0,350053826 |
| ENSG00000272033 | chr1  | AL136984.1 | 0,34791131  |
| ENSG00000236581 | chr13 | STARD13-AS | 0,345933769 |
| ENSG00000214970 | chr17 | AC005323.1 | 0,345866142 |
| ENSG00000260077 | chr2  | AC104794.2 | 0,34506333  |
| ENSG00000249406 | chr17 | AC015909.1 | 0,339754712 |
| ENSG00000280143 | chr11 | AP000892.3 | 0,337993455 |
| ENSG00000249859 | chr8  | PVT1       | 0,334230453 |
| ENSG00000232973 | chr2  | CYP1B1-AS1 | 0,333837676 |
| ENSG00000243176 | chr3  | AC092944.1 | 0,33112319  |
| ENSG00000238142 | chr1  | BX284668.5 | 0,328090784 |
| ENSG00000286511 | chr6  | Z95118.2   | 0,321952301 |
| ENSG00000273311 | chr22 | DGCR11     | 0,321276992 |
| ENSG00000247735 | chr16 | AC120114.1 | 0,321064072 |
| ENSG00000258725 | chr15 | PRC1-AS1   | 0,320971964 |
| ENSG00000275552 | chr14 | AC243965.2 | 0,32076654  |
| ENSG00000232648 | chr4  | AC107214.1 | 0,316378964 |
| ENSG00000227741 | chr1  | AL121987.2 | 0,316256627 |
| ENSG00000183250 | chr21 | LINC01547  | 0,315519554 |
| ENSG00000267257 | chr18 | AC105105.1 | 0,314921122 |
| ENSG00000223482 | chr10 | NUTM2A-AS1 | 0,314211419 |
| ENSG00000234912 | chr17 | SNHG20     | 0,314145592 |
| ENSG00000223403 | chr14 | MEG9       | 0,309197553 |
| ENSG00000225138 | chr5  | SLC9A3-AS1 | 0,307090376 |
| ENSG00000237149 | chr10 | ZNF503-AS2 | 0,304396457 |
| ENSG00000269984 | chr3  | AC078795.1 | 0,303808801 |
| ENSG00000228526 | chr1  | MIR34AHG   | 0,303490941 |
| ENSG00000273489 | chr7  | AC008264.2 | 0,302435032 |
| ENSG00000253658 | chr8  | LINC01592  | 0,301707811 |

**Table S3.** Poly RNA-seq identified 352 lncRNAs in human adipose-derived stem cells (hASC).

| GeneID          | Chr   | Gene_Name  | Log10(TPM)  |
|-----------------|-------|------------|-------------|
| ENSG00000259001 | chr14 | AL355075.4 | 4,401049467 |
| ENSG00000269900 | chr9  | RMRP       | 4,052223731 |
| ENSG00000276232 | chr12 | AC006064.5 | 2,996835832 |

|                 |       |              |             |
|-----------------|-------|--------------|-------------|
| ENSG00000130600 | chr11 | H19          | 2,707766449 |
| ENSG00000248187 | chr4  | AC078850.1   | 2,628215816 |
| ENSG00000270066 | chr1  | AL356488.2   | 2,564189894 |
| ENSG00000242125 | chr1  | SNHG3        | 2,514043942 |
| ENSG00000251562 | chr11 | MALAT1       | 2,483592562 |
| ENSG00000224259 | chr1  | LINC01133    | 2,337455215 |
| ENSG00000260032 | chr20 | NORAD        | 2,282332233 |
| ENSG00000270022 | chr22 | Z93241.1     | 2,23539442  |
| ENSG00000177410 | chr20 | ZFAS1        | 2,22394775  |
| ENSG00000234741 | chr1  | GAS5         | 2,01563822  |
| ENSG00000175061 | chr17 | SNHG29       | 2,003265381 |
| ENSG00000260025 | chr2  | CRIM1-DT     | 1,995904881 |
| ENSG00000245910 | chr8  | SNHG6        | 1,940953322 |
| ENSG00000261061 | chr16 | AC092718.4   | 1,896827218 |
| ENSG00000251022 | chr4  | THAP9-AS1    | 1,848343695 |
| ENSG00000270141 | chr3  | TERC         | 1,824308635 |
| ENSG00000225733 | chr3  | FGD5-AS1     | 1,813343021 |
| ENSG00000283907 | chr19 | AD000090.1   | 1,798868533 |
| ENSG00000270103 | chr1  | AL360012.1   | 1,730776189 |
| ENSG00000254911 | chr11 | SCARNA9      | 1,720778616 |
| ENSG00000230630 | chr1  | DNM3OS       | 1,706770609 |
| ENSG00000255717 | chr11 | SNHG1        | 1,664415882 |
| ENSG00000255248 | chr11 | MIR100HG     | 1,647842758 |
| ENSG00000265519 | chr17 | AC015922.2   | 1,64127723  |
| ENSG00000253738 | chr8  | OTUD6B-AS1   | 1,617078115 |
| ENSG00000203875 | chr6  | SNHG5        | 1,602573814 |
| ENSG00000232533 | chr7  | AC093673.1   | 1,602057963 |
| ENSG00000269893 | chr4  | SNHG8        | 1,562708466 |
| ENSG00000247556 | chr15 | OIP5-AS1     | 1,545273876 |
| ENSG00000282849 | chr1  | AL359834.1   | 1,465561254 |
| ENSG00000186594 | chr17 | MIR22HG      | 1,43949066  |
| ENSG00000257732 | chr12 | AC089983.1   | 1,439022064 |
| ENSG00000262202 | chr17 | AC007952.4   | 1,390695539 |
| ENSG00000276216 | chr1  | AC245014.3   | 1,378009025 |
| ENSG00000163364 | chr2  | LINC01116    | 1,373776743 |
| ENSG00000246430 | chr8  | LINC00968    | 1,35530858  |
| ENSG00000261573 | chr1  | AL157402.2   | 1,353892891 |
| ENSG00000203706 | chr1  | SERTAD4-AS1  | 1,352969105 |
| ENSG00000281649 | chr9  | EBLN3P       | 1,343651123 |
| ENSG00000163597 | chr17 | SNHG16       | 1,31013392  |
| ENSG00000272888 | chr15 | LINC01578    | 1,296688166 |
| ENSG00000254635 | chr10 | WAC-AS1      | 1,292385631 |
| ENSG00000265415 | chr17 | AC099850.3   | 1,29038993  |
| ENSG00000276107 | chr15 | AC037198.1   | 1,279121003 |
| ENSG00000272841 | chr6  | AL139393.3   | 1,271327078 |
| ENSG00000223811 | chr6  | AL589684.1   | 1,264343977 |
| ENSG00000253352 | chr22 | TUG1         | 1,264237905 |
| ENSG00000285090 | chr7  | AC002074.1   | 1,259224573 |
| ENSG00000234608 | chr12 | MAPKAPK5-AS1 | 1,253138104 |

|                 |       |              |             |
|-----------------|-------|--------------|-------------|
| ENSG00000224032 | chr5  | EPB41L4A-AS1 | 1,245406017 |
| ENSG00000234456 | chr7  | MAGI2-AS3    | 1,231959563 |
| ENSG00000254300 | chr8  | LINC01111    | 1,219455389 |
| ENSG00000250038 | chr4  | AC093791.1   | 1,218402687 |
| ENSG00000232527 | chr1  | AC245595.1   | 1,217498955 |
| ENSG00000241990 | chr22 | PRR34-AS1    | 1,21311966  |
| ENSG00000276855 | chr17 | AC015922.3   | 1,197970685 |
| ENSG00000273186 | chr9  | AL359091.5   | 1,190566686 |
| ENSG00000206195 | chr22 | DUXAP8       | 1,184932707 |
| ENSG00000278730 | chr17 | AC005332.6   | 1,175685226 |
| ENSG00000231405 | chr22 | AL008638.1   | 1,163426507 |
| ENSG00000258777 | chr14 | HIF1A-AS1    | 1,144015369 |
| ENSG00000228223 | chr6  | HCG11        | 1,14298615  |
| ENSG00000235531 | chr8  | MSC-AS1      | 1,140313659 |
| ENSG00000285964 | chr7  | AC002074.2   | 1,121993903 |
| ENSG00000266402 | chr17 | SNHG25       | 1,121858037 |
| ENSG00000245532 | chr11 | NEAT1        | 1,117538116 |
| ENSG00000230390 | chr13 | LINC01048    | 1,109663361 |
| ENSG00000224870 | chr1  | MRPL20-AS1   | 1,108200074 |
| ENSG00000280206 | chr16 | AC026401.3   | 1,103672428 |
| ENSG00000250786 | chr5  | SNHG18       | 1,10185826  |
| ENSG00000257621 | chr14 | PSMA3-AS1    | 1,100685824 |
| ENSG00000203644 | chr3  | AC083799.1   | 1,093126075 |
| ENSG00000288066 | chr2  | AC097448.1   | 1,09232403  |
| ENSG00000272482 | chr1  | AC254633.1   | 1,08026175  |
| ENSG00000177337 | chr18 | DLGAP1-AS1   | 1,080172673 |
| ENSG00000212978 | chr2  | AC016747.1   | 1,06957017  |
| ENSG00000278974 | chr4  | AC093909.6   | 1,068961262 |
| ENSG00000233016 | chr9  | SNHG7        | 1,064145879 |
| ENSG00000229847 | chr10 | EMX2OS       | 1,059813095 |
| ENSG00000287673 | chr18 | AC051635.1   | 1,051935905 |
| ENSG00000224985 | chr1  | AL590714.1   | 1,047559525 |
| ENSG00000254531 | chr4  | AP001816.1   | 1,033604382 |
| ENSG00000270504 | chr6  | AL391422.4   | 1,029079919 |
| ENSG00000234171 | chr2  | RNASEH1-AS1  | 1,018296983 |
| ENSG00000257698 | chr12 | GIHCG        | 1,015467218 |
| ENSG00000266208 | chr17 | AC080112.1   | 1,015308067 |
| ENSG00000258056 | chr12 | AC009779.2   | 1,011000448 |
| ENSG00000231106 | chr21 | LINC01436    | 1,01016426  |
| ENSG00000269958 | chr14 | AL049840.4   | 1,00181746  |
| ENSG00000248866 | chr4  | USP46-AS1    | 0,990714988 |
| ENSG00000172965 | chr2  | MIR4435-2HG  | 0,989127165 |
| ENSG00000261105 | chr13 | LMO7-AS1     | 0,980194873 |
| ENSG00000248092 | chr5  | NNT-AS1      | 0,971720509 |
| ENSG00000253982 | chr8  | AC100810.1   | 0,965439814 |
| ENSG00000233429 | chr7  | HOTAIRM1     | 0,956919485 |
| ENSG00000286039 | chr4  | AC093849.2   | 0,954629216 |
| ENSG00000232774 | chr14 | AL355916.1   | 0,947832128 |
| ENSG00000271643 | chr3  | AC112220.2   | 0,938986096 |

|                 |       |                |             |
|-----------------|-------|----------------|-------------|
| ENSG00000232855 | chr21 | AF165147.1     | 0,938917702 |
| ENSG00000270069 | chrX  | MIR222HG       | 0,931332149 |
| ENSG00000223485 | chr6  | LINC01615      | 0,915887705 |
| ENSG00000240731 | chr1  | AL139287.1     | 0,909277662 |
| ENSG00000275764 | chr12 | AC092747.4     | 0,905091969 |
| ENSG00000197180 | chrX  | AC244090.1     | 0,902433626 |
| ENSG00000264247 | chr18 | LINC00909      | 0,90167904  |
| ENSG00000269906 | chr14 | AL606834.1     | 0,901537425 |
| ENSG00000287001 | chr19 | AC010624.5     | 0,899918588 |
| ENSG00000254343 | chr8  | AC091563.1     | 0,892648398 |
| ENSG00000280128 | chr6  | AL662795.2     | 0,888380646 |
| ENSG00000272695 | chr13 | GAS6-DT        | 0,88308111  |
| ENSG00000267321 | chr17 | SNHG30         | 0,878837379 |
| ENSG00000230309 | chr6  | AL121718.1     | 0,874295734 |
| ENSG00000223478 | chr9  | AL441992.1     | 0,874209419 |
| ENSG00000272335 | chr5  | AC093297.2     | 0,873133001 |
| ENSG00000233521 | chr22 | LINC01638      | 0,872444795 |
| ENSG00000271147 | chrX  | ARMCX5-GPRASP2 | 0,871334646 |
| ENSG00000226950 | chr4  | DANCR          | 0,86924468  |
| ENSG00000245937 | chr5  | LINC01184      | 0,86840988  |
| ENSG00000253161 | chr8  | LINC01605      | 0,860609435 |
| ENSG00000260604 | chr6  | AL590004.3     | 0,859913455 |
| ENSG00000231290 | chr20 | APCDD1L-DT     | 0,85840916  |
| ENSG00000267058 | chr19 | AC006213.2     | 0,853796339 |
| ENSG00000260708 | chr22 | AL118516.1     | 0,838582184 |
| ENSG00000254473 | chr9  | AL354920.1     | 0,834827115 |
| ENSG00000268205 | chr19 | AC005261.2     | 0,832801042 |
| ENSG00000245694 | chr16 | CRNDE          | 0,827310709 |
| ENSG00000230074 | chr9  | AL162231.2     | 0,819114922 |
| ENSG00000272086 | chr5  | AC025181.2     | 0,809174542 |
| ENSG00000272923 | chr16 | AC092139.1     | 0,808825319 |
| ENSG00000269825 | chr19 | AC022150.4     | 0,808480848 |
| ENSG00000268001 | chr19 | CARD8-AS1      | 0,806385135 |
| ENSG00000267325 | chr18 | LINC01415      | 0,805717857 |
| ENSG00000287287 | chr9  | AL133476.1     | 0,804685207 |
| ENSG00000197989 | chr1  | SNHG12         | 0,804113599 |
| ENSG00000223749 | chrX  | MIR503HG       | 0,803370559 |
| ENSG00000263753 | chr18 | LINC00667      | 0,800899284 |
| ENSG00000287151 | chr2  | C2orf27A       | 0,795207188 |
| ENSG00000260267 | chr16 | AC026471.1     | 0,794953094 |
| ENSG00000179523 | chr15 | EIF3J-DT       | 0,794941091 |
| ENSG00000239407 | chrX  | Z68871.1       | 0,788965072 |
| ENSG00000215039 | chr12 | CD27-AS1       | 0,786671258 |
| ENSG00000248869 | chr4  | LINC02511      | 0,785337333 |
| ENSG00000272288 | chr6  | AL451165.2     | 0,778749473 |
| ENSG00000255135 | chr11 | AP002360.1     | 0,778626076 |
| ENSG00000232956 | chr7  | SNHG15         | 0,77698549  |
| ENSG00000254615 | chr8  | AC027031.2     | 0,774329134 |
| ENSG00000282057 | chr1  | AC092807.3     | 0,77282148  |



|                 |       |            |             |
|-----------------|-------|------------|-------------|
| ENSG00000259353 | chr15 | AC090515.4 | 0,772071378 |
| ENSG00000248008 | chr12 | NRAV       | 0,772059084 |
| ENSG00000271882 | chr8  | AP001330.5 | 0,771324847 |
| ENSG00000265688 | chr17 | MAFG-DT    | 0,768484105 |
| ENSG00000234327 | chr17 | AC012146.1 | 0,761735762 |
| ENSG00000223764 | chr1  | LINC02593  | 0,761269057 |
| ENSG00000261189 | chr6  | AL031058.1 | 0,758305366 |
| ENSG00000223768 | chr21 | LINC00205  | 0,757762197 |
| ENSG00000279118 | chr5  | AC093535.2 | 0,757644186 |
| ENSG00000253746 | chr8  | AC091182.2 | 0,755126427 |
| ENSG00000272369 | chr12 | AC008035.1 | 0,74767694  |
| ENSG00000275765 | chr5  | AC091982.3 | 0,740438531 |
| ENSG00000230479 | chr21 | AP000695.1 | 0,735345206 |
| ENSG00000256073 | chr21 | URB1-AS1   | 0,730078807 |
| ENSG00000227540 | chr10 | AC016394.1 | 0,720017671 |
| ENSG00000280088 | chr12 | AC126474.2 | 0,718952788 |
| ENSG00000236255 | chr2  | AC009404.1 | 0,714663709 |
| ENSG00000171889 | chr9  | MIR31HG    | 0,713650276 |
| ENSG00000228106 | chr1  | AL392172.1 | 0,708050399 |
| ENSG00000261801 | chr15 | LOXL1-AS1  | 0,702415708 |
| ENSG00000245571 | chr11 | FAM111A-DT | 0,69638927  |
| ENSG00000189223 | chr2  | PAX8-AS1   | 0,692329256 |
| ENSG00000254837 | chr11 | AP001372.2 | 0,690207295 |
| ENSG00000279602 | chr17 | AC109326.1 | 0,68671601  |
| ENSG00000177822 | chr4  | TENM3-AS1  | 0,684784079 |
| ENSG00000287038 | chr9  | AL162388.2 | 0,68381459  |
| ENSG00000232442 | chr20 | MHENCRC    | 0,680368539 |
| ENSG00000223813 | chr7  | AC007255.1 | 0,679623667 |
| ENSG00000249378 | chr4  | LINC01060  | 0,67855053  |
| ENSG00000259705 | chr15 | AC084757.3 | 0,677214182 |
| ENSG00000287104 | chr4  | AC097382.3 | 0,674165719 |
| ENSG00000247134 | chr8  | AC090204.1 | 0,674133145 |
| ENSG00000233117 | chr10 | LINC00702  | 0,673170448 |
| ENSG00000260442 | chr16 | ATP2A1-AS1 | 0,672204465 |
| ENSG00000253658 | chr8  | LINC01592  | 0,669835495 |
| ENSG00000237523 | chr10 | LINC00857  | 0,667490582 |
| ENSG00000241316 | chr3  | SUCLG2-AS1 | 0,665847978 |
| ENSG00000281468 | chr19 | AC006504.7 | 0,659232974 |
| ENSG00000274605 | chr13 | AL355338.1 | 0,655549725 |
| ENSG00000261888 | chr17 | AC144831.1 | 0,654268335 |
| ENSG00000250064 | chr4  | AC097480.1 | 0,654108838 |
| ENSG00000267100 | chr19 | ILF3-DT    | 0,653387112 |
| ENSG00000233901 | chr9  | LINC01503  | 0,641500748 |
| ENSG00000287853 | chr20 | AL031668.2 | 0,637823418 |
| ENSG00000223960 | chr2  | PRKRA-AS1  | 0,634146023 |
| ENSG00000260231 | chr7  | KDM7A-DT   | 0,633733587 |
| ENSG00000250986 | chr4  | LINC02600  | 0,632638072 |
| ENSG00000286388 | chr5  | AC026748.3 | 0,625447909 |
| ENSG00000273760 | chr10 | AC245041.1 | 0,620803703 |

|                 |       |             |             |
|-----------------|-------|-------------|-------------|
| ENSG00000222041 | chr2  | CYTOR       | 0,614953179 |
| ENSG00000229647 | chr2  | MYOSLID     | 0,611895848 |
| ENSG00000246560 | chr4  | UBE2D3-AS1  | 0,610602103 |
| ENSG00000174365 | chr20 | SNHG11      | 0,607402249 |
| ENSG00000214106 | chr7  | PAXIP1-AS2  | 0,607204695 |
| ENSG00000265666 | chr17 | RARA-AS1    | 0,599993337 |
| ENSG00000178440 | chr10 | LINC00843   | 0,598237875 |
| ENSG00000259943 | chr1  | AL050341.2  | 0,598096939 |
| ENSG00000256268 | chr12 | LINC02454   | 0,597653439 |
| ENSG00000259865 | chr1  | AL390728.6  | 0,597627482 |
| ENSG00000279123 | chr16 | AC027281.2  | 0,597017946 |
| ENSG00000276170 | chr17 | AC244153.1  | 0,596930939 |
| ENSG00000287929 | chr1  | AL354953.1  | 0,596486921 |
| ENSG00000280798 | chr11 | LINC00294   | 0,594610214 |
| ENSG00000248275 | chr5  | TRIM52-AS1  | 0,593810247 |
| ENSG00000238058 | chr9  | AL355574.1  | 0,593292305 |
| ENSG00000229152 | chr13 | ANKRD10-IT1 | 0,59277498  |
| ENSG00000153363 | chr1  | LINC00467   | 0,591396465 |
| ENSG00000271122 | chr7  | AC018647.2  | 0,58861902  |
| ENSG00000248469 | chr5  | AC139491.1  | 0,588167037 |
| ENSG00000248927 | chr5  | AC114284.1  | 0,587282474 |
| ENSG00000239332 | chr2  | LINC01119   | 0,585240562 |
| ENSG00000262003 | chr17 | AC087392.1  | 0,582051114 |
| ENSG00000285967 | chr5  | NIPBL-DT    | 0,577552895 |
| ENSG00000225177 | chr6  | AL590617.2  | 0,576169306 |
| ENSG00000250742 | chr12 | LINC02381   | 0,575924121 |
| ENSG00000287086 | chr3  | AC034193.1  | 0,57269499  |
| ENSG00000226328 | chr22 | NUP50-DT    | 0,566998754 |
| ENSG00000285906 | chr3  | AC083855.2  | 0,565902833 |
| ENSG00000267577 | chr19 | AC010327.4  | 0,564658137 |
| ENSG00000241764 | chr7  | AC002467.1  | 0,563830216 |
| ENSG00000206573 | chr3  | THUMPD3-AS1 | 0,559013972 |
| ENSG00000259721 | chr15 | AC090877.2  | 0,55684519  |
| ENSG00000229619 | chr3  | MBNL1-AS1   | 0,55589694  |
| ENSG00000235513 | chr22 | AL035681.1  | 0,554812457 |
| ENSG00000272975 | chr17 | MYHAS       | 0,54985174  |
| ENSG00000215256 | chr14 | DHRS4-AS1   | 0,548130297 |
| ENSG00000203993 | chr9  | ARRDC1-AS1  | 0,54558586  |
| ENSG00000261824 | chr19 | LINC00662   | 0,540895801 |
| ENSG00000233223 | chr17 | AC016876.1  | 0,539255724 |
| ENSG00000257167 | chr12 | TMPO-AS1    | 0,538115349 |
| ENSG00000234494 | chr17 | SP2-AS1     | 0,535835809 |
| ENSG00000267745 | chr17 | AC060766.7  | 0,534578225 |
| ENSG00000231074 | chr6  | HCG18       | 0,531756799 |
| ENSG00000231365 | chr1  | WARS2-AS1   | 0,531508765 |
| ENSG00000225279 | chr1  | AL121987.1  | 0,530012753 |
| ENSG00000176124 | chr13 | DLEU1       | 0,528596423 |
| ENSG00000225746 | chr14 | MEG8        | 0,522934432 |
| ENSG00000278970 | chr5  | HEIH        | 0,51887933  |

|                 |       |             |             |
|-----------------|-------|-------------|-------------|
| ENSG00000267317 | chr19 | AC027307.2  | 0,514070195 |
| ENSG00000233818 | chr21 | AP000695.2  | 0,512855765 |
| ENSG00000255737 | chr12 | AGAP2-AS1   | 0,510105406 |
| ENSG00000214293 | chr7  | APTR        | 0,507383083 |
| ENSG00000285646 | chr1  | AL021155.2  | 0,506895704 |
| ENSG00000268858 | chr20 | AL118506.1  | 0,505342886 |
| ENSG00000224046 | chr7  | AC005076.1  | 0,503920851 |
| ENSG00000286511 | chr6  | Z95118.2    | 0,502385512 |
| ENSG00000238142 | chr1  | BX284668.5  | 0,499923823 |
| ENSG00000245146 | chr5  | MALINC1     | 0,489164638 |
| ENSG00000267519 | chr19 | AC020916.1  | 0,487834391 |
| ENSG00000272518 | chr8  | AC036214.2  | 0,48773814  |
| ENSG00000246859 | chr5  | STARD4-AS1  | 0,486959936 |
| ENSG00000226137 | chr17 | BAIAP2-DT   | 0,486855147 |
| ENSG00000204054 | chr9  | LINC00963   | 0,486785961 |
| ENSG00000233251 | chr2  | AC007743.1  | 0,486419041 |
| ENSG00000262454 | chr16 | MIR193BHG   | 0,485033394 |
| ENSG00000177738 | chr5  | AC025171.1  | 0,484536234 |
| ENSG00000255874 | chr13 | LINC00346   | 0,484273726 |
| ENSG00000286873 | chr2  | AC012306.3  | 0,482513845 |
| ENSG00000280241 | chr4  | AC079298.3  | 0,480691564 |
| ENSG00000237149 | chr10 | ZNF503-AS2  | 0,479609236 |
| ENSG00000251314 | chr5  | AC104123.1  | 0,4770769   |
| ENSG00000215808 | chr1  | LINC01139   | 0,476129374 |
| ENSG00000177335 | chr8  | C8orf31     | 0,475524936 |
| ENSG00000246985 | chr12 | SOCS2-AS1   | 0,471633484 |
| ENSG00000279369 | chr17 | AC046185.3  | 0,471629232 |
| ENSG00000260329 | chr12 | AC007541.1  | 0,467145869 |
| ENSG00000257261 | chr12 | AC008014.1  | 0,461726911 |
| ENSG00000260920 | chr1  | AL031985.3  | 0,4590587   |
| ENSG00000283175 | chr3  | AC007920.2  | 0,456010386 |
| ENSG00000269386 | chr19 | RAB11B-AS1  | 0,454096432 |
| ENSG00000244625 | chr22 | MIATNB      | 0,449637888 |
| ENSG00000261188 | chr22 | Z95115.1    | 0,449204132 |
| ENSG00000229124 | chr10 | VIM-AS1     | 0,448373763 |
| ENSG00000259345 | chr15 | AC013652.1  | 0,446895183 |
| ENSG00000229563 | chrX  | LINC01204   | 0,443528849 |
| ENSG00000285928 | chr1  | AC103591.4  | 0,439081072 |
| ENSG00000287839 | chr1  | AL353807.5  | 0,437231922 |
| ENSG00000204685 | chr2  | STARD7-AS1  | 0,436591769 |
| ENSG00000273311 | chr22 | DGCR11      | 0,435118084 |
| ENSG00000272711 | chr2  | AC019069.1  | 0,431732657 |
| ENSG00000235770 | chr2  | LINC00607   | 0,431531792 |
| ENSG00000279713 | chr17 | AC080038.4  | 0,429399965 |
| ENSG00000229043 | chr7  | AC091729.3  | 0,427108415 |
| ENSG00000278922 | chr16 | AC002310.5  | 0,426968893 |
| ENSG00000240859 | chr7  | AC093627.4  | 0,426025525 |
| ENSG00000272913 | chr2  | AC009237.14 | 0,423710418 |
| ENSG00000234840 | chr9  | LINC01239   | 0,420318005 |

|                 |       |             |             |
|-----------------|-------|-------------|-------------|
| ENSG00000245522 | chr11 | AC026250.1  | 0,418001762 |
| ENSG00000268894 | chr10 | PLCE1-AS1   | 0,416236225 |
| ENSG00000269439 | chr19 | AC010618.4  | 0,415395649 |
| ENSG00000287263 | chr5  | AC008875.3  | 0,414245227 |
| ENSG00000260257 | chr20 | AL035071.1  | 0,410319565 |
| ENSG00000235609 | chr21 | AF127577.4  | 0,408625255 |
| ENSG00000271936 | chr2  | AC012073.1  | 0,405567716 |
| ENSG00000247516 | chr5  | MIR4458HG   | 0,402864372 |
| ENSG00000270194 | chr3  | AC097359.2  | 0,396402418 |
| ENSG00000257702 | chr2  | LBX2-AS1    | 0,394451196 |
| ENSG00000214548 | chr14 | MEG3        | 0,393564012 |
| ENSG00000272221 | chr6  | AL645933.2  | 0,391881302 |
| ENSG00000246763 | chr5  | RGMB-AS1    | 0,390492894 |
| ENSG00000267040 | chr18 | AC027097.1  | 0,389198205 |
| ENSG00000231312 | chr2  | MAP4K3-DT   | 0,388620552 |
| ENSG00000230487 | chr7  | PSMG3-AS1   | 0,388384997 |
| ENSG00000225791 | chr6  | TRAM2-AS1   | 0,387289846 |
| ENSG00000203721 | chr1  | LINC00862   | 0,382719217 |
| ENSG00000287916 | chr3  | AC091607.2  | 0,382102232 |
| ENSG00000266680 | chr6  | AL135905.1  | 0,379906323 |
| ENSG00000258634 | chr1  | AL160006.1  | 0,376114343 |
| ENSG00000203362 | chr6  | POLH-AS1    | 0,375291035 |
| ENSG00000242516 | chr3  | LINC00960   | 0,374693245 |
| ENSG00000285184 | chr1  | AC244033.2  | 0,37286073  |
| ENSG00000236859 | chr2  | NIFK-AS1    | 0,372734851 |
| ENSG00000275202 | chr13 | AL161421.1  | 0,370531596 |
| ENSG00000287222 | chr8  | AC234917.3  | 0,369733559 |
| ENSG00000198496 | chr17 | NBR2        | 0,368831405 |
| ENSG00000237807 | chr8  | AC022034.1  | 0,367431077 |
| ENSG00000271780 | chr14 | AL118558.3  | 0,365933509 |
| ENSG00000279207 | chr17 | AC015813.6  | 0,365306814 |
| ENSG00000272686 | chr7  | AC006333.2  | 0,357122372 |
| ENSG00000196810 | chr4  | CTBP1-DT    | 0,35278074  |
| ENSG00000272341 | chr6  | AL137003.2  | 0,352636218 |
| ENSG00000227619 | chr9  | AL391056.1  | 0,35088738  |
| ENSG00000205791 | chr12 | LOH12CR2    | 0,349736931 |
| ENSG00000233184 | chr1  | AC093157.1  | 0,346733866 |
| ENSG00000231721 | chr7  | LINC-PINT   | 0,34635719  |
| ENSG00000237187 | chr5  | NR2F1-AS1   | 0,344836111 |
| ENSG00000216895 | chr7  | AC009403.1  | 0,341969907 |
| ENSG00000246089 | chr8  | AC016065.1  | 0,340158718 |
| ENSG00000286695 | chr3  | AC026316.5  | 0,332849712 |
| ENSG00000286532 | chr2  | PARTICL     | 0,331331868 |
| ENSG00000279253 | chr20 | AL121753.2  | 0,331214751 |
| ENSG00000180769 | chr4  | WDFY3-AS2   | 0,327502062 |
| ENSG00000260578 | chr18 | AC110597.1  | 0,326422933 |
| ENSG00000263400 | chr17 | TMEM220-AS1 | 0,32319807  |
| ENSG00000239268 | chr3  | AC092691.1  | 0,321355838 |
| ENSG00000281641 | chr8  | SAMD12-AS1  | 0,320519672 |

|                 |       |            |             |
|-----------------|-------|------------|-------------|
| ENSG00000231185 | chr5  | SPRY4-AS1  | 0,320451058 |
| ENSG00000166770 | chr19 | ZNF667-AS1 | 0,320397758 |
| ENSG00000288022 | chr3  | AC117488.1 | 0,318979647 |
| ENSG00000277969 | chr17 | AC006449.6 | 0,310984342 |
| ENSG00000234380 | chr21 | LINC01426  | 0,30786107  |
| ENSG00000261167 | chr3  | AC107027.3 | 0,307342701 |

**Table S4.** 99 common lncRNAs in Ribo-seq, Total RNA-seq and Poly RNA-seq in human adipose-derived stem cells (hASC).

| Gene_Name  | Log10(TPM_ribo) | Log10(TPM_total) | Log10(TPM_poly) |
|------------|-----------------|------------------|-----------------|
| AC005261.2 | 0,868238558     | 1,15946483       | 0,832801042     |
| AC006064.5 | 3,064485538     | 3,319720185      | 2,996835832     |
| AC008014.1 | 0,546852211     | 0,446241073      | 0,461726911     |
| AC008875.3 | 0,475236848     | 0,426258912      | 0,414245227     |
| AC010618.4 | 0,575380821     | 0,619452478      | 0,415395649     |
| AC016747.1 | 0,486309553     | 0,923078163      | 1,06957017      |
| AC016876.1 | 0,839051189     | 0,696036202      | 0,539255724     |
| AC020916.1 | 0,894957746     | 1,017518546      | 0,487834391     |
| AC025181.2 | 1,153937153     | 1,005318289      | 0,809174542     |
| AC026748.3 | 0,715425712     | 0,77606647       | 0,625447909     |
| AC037198.1 | 1,436045596     | 2,363102321      | 1,279121003     |
| AC078850.1 | 1,412064432     | 2,200073239      | 2,628215816     |
| AC090877.2 | 1,119091745     | 0,919672727      | 0,55684519      |
| AC092807.3 | 0,500965379     | 1,258247479      | 0,77282148      |
| AC093535.2 | 0,612320565     | 0,756762767      | 0,757644186     |
| AC093673.1 | 1,16735527      | 1,73125492       | 1,602057963     |
| AC100810.1 | 0,800145112     | 0,814253545      | 0,965439814     |
| AC109326.1 | 1,113299963     | 1,269455036      | 0,68671601      |
| AC144831.1 | 1,641062035     | 0,651852305      | 0,654268335     |
| AC254633.1 | 1,719864781     | 1,041485338      | 1,08026175      |
| AL035681.1 | 0,321874423     | 0,496279848      | 0,554812457     |
| AL139393.3 | 1,240706972     | 0,957126153      | 1,271327078     |
| AL160006.1 | 0,558149656     | 0,658172718      | 0,376114343     |
| AL355075.4 | 3,868363709     | 4,923098404      | 4,401049467     |
| AL356488.2 | 3,96874259      | 2,91994614       | 2,564189894     |
| AL360012.1 | 4,164638917     | 1,808820623      | 1,730776189     |
| AL391422.4 | 1,357407804     | 0,860689126      | 1,029079919     |
| AL590004.3 | 0,792883406     | 1,110710974      | 0,859913455     |
| AP001816.1 | 1,195246536     | 0,910704676      | 1,033604382     |
| ARRDC1-AS1 | 0,508495282     | 0,758943002      | 0,54558586      |
| BAIAP2-DT  | 0,762536839     | 0,461481793      | 0,486855147     |
| BX284668.5 | 0,880999593     | 0,328090784      | 0,499923823     |
| C2orf27A   | 0,304375299     | 0,702555395      | 0,795207188     |
| C8orf31    | 0,709948319     | 0,746051046      | 0,475524936     |
| CD27-AS1   | 0,746315292     | 0,78382318       | 0,786671258     |
| CRNDE      | 0,367679155     | 0,988667768      | 0,827310709     |
| CTBP1-DT   | 0,407942817     | 0,430825175      | 0,35278074      |
| CYTOR      | 0,412370035     | 0,585432973      | 0,614953179     |
| DNM3OS     | 0,650550672     | 1,818038368      | 1,706770609     |

|              |             |             |             |
|--------------|-------------|-------------|-------------|
| EBLN3P       | 0,88235128  | 1,165305025 | 1,343651123 |
| EMX2OS       | 0,926289899 | 1,253720045 | 1,059813095 |
| EPB41L4A-AS1 | 1,31695065  | 1,235742813 | 1,245406017 |
| FGD5-AS1     | 1,098621188 | 1,845224745 | 1,813343021 |
| GAS5         | 3,387257122 | 1,996370173 | 2,01563822  |
| H19          | 3,220617018 | 2,753565136 | 2,707766449 |
| HCG11        | 0,502113896 | 1,16779908  | 1,14298615  |
| HCG18        | 0,4569292   | 0,726114993 | 0,531756799 |
| LINC-PINT    | 0,421182534 | 0,932418156 | 0,34635719  |
| LINC00205    | 0,845220329 | 0,888515766 | 0,757762197 |
| LINC00857    | 0,579429614 | 0,79959253  | 0,667490582 |
| LINC00909    | 0,421744001 | 0,86143323  | 0,90167904  |
| LINC00963    | 0,5120009   | 0,635253803 | 0,486785961 |
| LINC00968    | 0,70670177  | 0,951866954 | 1,35530858  |
| LINC01116    | 1,19543506  | 1,084604756 | 1,373776743 |
| LINC01133    | 0,969857273 | 1,994058605 | 2,337455215 |
| LINC01503    | 0,901050148 | 0,55817718  | 0,641500748 |
| LINC01578    | 0,442000673 | 1,384991004 | 1,296688166 |
| LINC01615    | 0,774229038 | 1,035784638 | 0,915887705 |
| LINC02381    | 0,74512221  | 0,639227124 | 0,575924121 |
| LINC02593    | 1,263762918 | 0,951287251 | 0,761269057 |
| MAFG-DT      | 0,905441044 | 0,608715578 | 0,768484105 |
| MAGI2-AS3    | 0,477113274 | 1,147561964 | 1,231959563 |
| MALAT1       | 2,813552084 | 3,628022855 | 2,483592562 |
| MAPKAPK5-AS1 | 0,686258942 | 0,788661706 | 1,253138104 |
| MEG3         | 1,107147847 | 1,315076306 | 0,393564012 |
| MEG8         | 1,371372611 | 1,002207181 | 0,522934432 |
| MIR100HG     | 0,538854147 | 1,39725025  | 1,647842758 |
| MIR22HG      | 2,00077012  | 1,769065451 | 1,43949066  |
| MIR4435-2HG  | 0,354597862 | 0,933252769 | 0,989127165 |
| MIR503HG     | 0,66664711  | 1,609261126 | 0,803370559 |
| MRPL20-AS1   | 0,831597539 | 1,117326338 | 1,108200074 |
| MSC-AS1      | 0,681584906 | 0,981760253 | 1,140313659 |
| NEAT1        | 2,019564477 | 1,892656718 | 1,117538116 |
| NORAD        | 1,299534542 | 2,218462437 | 2,282332233 |
| OIP5-AS1     | 0,323208872 | 1,436525646 | 1,545273876 |
| PSMA3-AS1    | 0,387924282 | 1,111806221 | 1,100685824 |
| PSMG3-AS1    | 0,877884416 | 0,381703231 | 0,388384997 |
| RMRP         | 3,872393912 | 4,442717312 | 4,052223731 |
| SCARNA9      | 2,350233662 | 2,07945328  | 1,720778616 |
| SNHG1        | 3,094972281 | 1,712684226 | 1,664415882 |
| SNHG11       | 1,861130787 | 0,732871334 | 0,607402249 |
| SNHG12       | 4,197418754 | 1,13413268  | 0,804113599 |
| SNHG15       | 3,108720596 | 1,146947238 | 0,77698549  |
| SNHG16       | 2,15846236  | 1,432447103 | 1,31013392  |
| SNHG18       | 0,834801042 | 1,105656666 | 1,10185826  |
| SNHG25       | 3,78236774  | 1,327145163 | 1,121858037 |
| SNHG29       | 2,774810293 | 2,059659307 | 2,003265381 |
| SNHG3        | 2,465716925 | 2,797276004 | 2,514043942 |

|            |             |             |             |
|------------|-------------|-------------|-------------|
| SNHG5      | 2,253682945 | 1,802321565 | 1,602573814 |
| SNHG6      | 2,15023555  | 1,798708414 | 1,940953322 |
| SNHG7      | 2,529082333 | 1,149182018 | 1,064145879 |
| SNHG8      | 3,127156356 | 1,351534553 | 1,562708466 |
| TENM3-AS1  | 0,304069135 | 0,592132286 | 0,684784079 |
| TERC       | 3,068554656 | 2,190171796 | 1,824308635 |
| TUG1       | 1,139738782 | 1,394891005 | 1,264237905 |
| URB1-AS1   | 1,289778173 | 0,694465515 | 0,730078807 |
| Z93241.1   | 2,944930567 | 2,363696846 | 2,23539442  |
| ZFAS1      | 1,697557279 | 2,000106581 | 2,22394775  |
| ZNF503-AS2 | 0,568088178 | 0,304396457 | 0,479609236 |
